# Supplementary material for: Does Health & Her app use improve menopausal symptoms? A longitudinal cohort study
Source: PubMed Central journal article supplement — BMJ Open. 2023 Dec 30;13(12):e077185. doi: 10.1136/bmjopen-2023-077185 (PMC10759107; doi:10.1136/bmjopen-2023-077185), 2023-12-30
Supplement: bmjopen-2023-077185.draft_revisions.pdf [file bmjopen-2023-077185.draft_revisions.pdf]

# BMJ Open

BMJ Open is committed to open peer review. As part of this commitment we make the peer review history of every article we publish publicly available.

When an article is published we post the peer reviewers' comments and the authors' responses online. We also post the versions of the paper that were used during peer review. These are the versions that the peer review comments apply to.

The versions of the paper that follow are the versions that were submitted during the peer review process. They are not the versions of record or the final published versions. They should not be cited or distributed as the published version of this manuscript.

BMJ Open is an open access journal and the full, final, typeset and author-corrected version of record of the manuscript is available on our site with no access controls, subscription charges or pay-per-view fees (<http://bmjopen.bmj.com>).

If you have any questions on BMJ Open's open peer review process please email [info.bmjopen@bmj.com](mailto:info.bmjopen@bmj.com)

# BMJ Open

## The Health & Her App is Associated with Improved Symptom Outcomes Among 1,900 App Users: A Digital Cohort Study

|                               |                                                                                                                                                                                                                                                                                                                |
|-------------------------------|----------------------------------------------------------------------------------------------------------------------------------------------------------------------------------------------------------------------------------------------------------------------------------------------------------------|
| Journal:                      | <i>BMJ Open</i>                                                                                                                                                                                                                                                                                                |
| Manuscript ID                 | bmjopen-2023-077185                                                                                                                                                                                                                                                                                            |
| Article Type:                 | Original research                                                                                                                                                                                                                                                                                              |
| Date Submitted by the Author: | 27-Jun-2023                                                                                                                                                                                                                                                                                                    |
| Complete List of Authors:     | Andrews, Robin; Cardiff University, Lancaster, Deborah; University of South Wales, Life Sciences & Education: School of Psychology<br>Bache, Kate; Health & Her<br>Lacey, Arron; Swansea University, 1Neurology and Molecular Neuroscience Group, Institute of Life Science, Swansea University Medical School |
| Keywords:                     | GYNAECOLOGY, Reproductive medicine < GYNAECOLOGY, Health informatics < BIOTECHNOLOGY & BIOINFORMATICS, Telemedicine < BIOTECHNOLOGY & BIOINFORMATICS, Quality of Life, MENTAL HEALTH                                                                                                                           |
|                               |                                                                                                                                                                                                                                                                                                                |

SCHOLARONE™  
Manuscripts

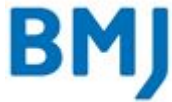

I, the Submitting Author has the right to grant and does grant on behalf of all authors of the Work (as defined in the below author licence), an exclusive licence and/or a non-exclusive licence for contributions from authors who are: i) UK Crown employees; ii) where BMJ has agreed a CC-BY licence shall apply, and/or iii) in accordance with the terms applicable for US Federal Government officers or employees acting as part of their official duties; on a worldwide, perpetual, irrevocable, royalty-free basis to BMJ Publishing Group Ltd ("BMJ") its licensees and where the relevant Journal is co-owned by BMJ to the co-owners of the Journal, to publish the Work in this journal and any other BMJ products and to exploit all rights, as set out in our [licence](#).

The Submitting Author accepts and understands that any supply made under these terms is made by BMJ to the Submitting Author unless you are acting as an employee on behalf of your employer or a postgraduate student of an affiliated institution which is paying any applicable article publishing charge ("APC") for Open Access articles. Where the Submitting Author wishes to make the Work available on an Open Access basis (and intends to pay the relevant APC), the terms of reuse of such Open Access shall be governed by a Creative Commons licence – details of these licences and which [Creative Commons](#) licence will apply to this Work are set out in our licence referred to above.

Other than as permitted in any relevant BMJ Author's Self Archiving Policies, I confirm this Work has not been accepted for publication elsewhere, is not being considered for publication elsewhere and does not duplicate material already published. I confirm all authors consent to publication of this Work and authorise the granting of this licence.

# The Health & Her App is Associated with Improved Symptom Outcomes Among 1,900 App Users: A Digital Cohort Study

Andrews. R., Lancaster. D., Bache. K., Lacey. A.

**Corresponding author: Dr Robin Andrews (PhD), Cardiff University; Health & Her**

**Contact details & affiliations of authors:**

1. Dr Robin Andrews (PhD), [AndrewsR16@cardiff.ac.uk](mailto:AndrewsR16@cardiff.ac.uk), Cardiff University; Health & Her
2. Professor Deborah Lancaster (PhD), [Deborah.lancastle@southwales.ac.uk](mailto:Deborah.lancastle@southwales.ac.uk), University of South Wales
3. Kate Bache (MChem), [kate@healthandher.com](mailto:kate@healthandher.com), Health & Her
4. Dr Arron Lacey (PhD), [a.s.lacey@swansea.ac.uk](mailto:a.s.lacey@swansea.ac.uk), Swansea University

**Key words:**

- Menopause
- m-health
- Women's health
- Menopausal symptoms
- Symptom monitoring
- Menstrual tracking

**Word count: 3959**

## **Abstract**

**Objectives:** The Health & Her app provides menopausal women with a means of monitoring their symptoms, symptom triggers, and menstrual periods, and enables them to engage in a variety of digital activities designed to promote wellbeing. The aim of this study was to examine whether sustained weekly engagement with the app is associated with improvements in menopausal symptoms.

**Design:** A quasi-experimental cohort study.

**Setting:** Analysed data collected from Health & Her app users.

**Participants:** 1,900 women who provided symptom data via the app across a 2-month period.

**Primary and Secondary outcome measures:** Symptom changes from baseline to 2 months was the outcome measure. A linear mixed effects model explored whether levels of weekly app engagement influenced symptom changes. Secondary analyses explored whether app-usage factors such as total number of days spent logging symptoms, reporting triggers, reporting menstrual periods, and using in-app activities were independently predictive of symptom changes from baseline. Covariates included HRT (Hormone Replacement Therapy) use, hormonal contraceptive use, present comorbidities, age, and dietary supplement use.

**Results:** Findings demonstrated that greater engagement with the Health & Her app for 2-months was associated with greater reductions in symptoms over time. Daily use of in-app activities and logging symptoms and menstrual periods were each independently associated with symptom reductions.

**Conclusions:** This study demonstrated that greater weekly engagement with the app was associated with greater reductions in symptoms. It is recommended that women be made aware of menopause-specific apps, such as that provided by Health & Her, to support them to manage their symptoms.

## **Article Summary**

### **Strengths and Limitations of this study:**

- Outcome measures (i.e., symptom changes) were self-reported.
- This study was quasi-experimental and not randomised.
- This study controlled for multiple factors known to influence symptoms during menopause.
- This study included a large sample of perimenopausal and menopause women (N=1900).

## **Introduction**

Menopause is a naturally occurring reproductive phase in which women permanently cease to menstruate. Menopause is associated with a number of symptoms, which in some women, can heavily impact health and quality of life (1). The main treatment for menopausal symptoms is Hormone Replacement Therapy (HRT). Despite menopause encompassing a wide variety of symptom domains, including psychological issues, HRT is currently only indicated for alleviating vasomotor and genitourinary symptoms (2). Thus, there is a need to identify alternative interventions to HRT which could support women to manage their health during menopause.

Use of freely available mobile health (m-health) apps have been associated with improved health outcomes. Zhaunova et al. (3) found evidence that an app which enabled women to monitor their menstrual periods was associated with improvements in physical symptoms, mental health and reproductive health knowledge. A study by McCloud et al. (4) demonstrated that an app which provided digital Cognitive Behavioural Therapy (CBT) activities and mood monitoring was associated with improvements in anxiety and depression. Studies in women experiencing menopausal symptoms suggest that symptom monitoring can improve symptoms, reduce negative emotions, and could heighten health awareness, helping women avoid behaviours which could negatively impact their health (5)(6). Therefore, digital tools which support symptom monitoring may be beneficial for menopausal women. Among women who choose to use HRT or other interventions for their menopausal symptoms, such as dietary supplements or exercise therapies, adjunct digital tools may be beneficial for helping them track the impact and efficacy of these treatments.

To the authors' knowledge, no m-health apps have been formally evaluated to assess whether they improve symptoms during menopause. The Health & Her app enables women to track their menopausal symptoms, symptom triggers, and menstrual periods. The app also provides users with a range of activities which can help them manage their menopausal symptoms including CBT, pelvic floor, and meditation exercises. The app also signposts users to health and lifestyle articles written by experts such as general practitioners and psychologists, as well as products which are designed to support wellness, including own-brand Health & Her dietary supplements, and dietary supplements of external brands.

The primary aim of the present study was to establish whether use of the Health & Her app over a 2-month period was associated with improved symptom outcomes. We present a quasi-experimental study of symptom change over time using the Health & Her iOS and Android mobile phone app. Our study observed whether women reported statistically significant reductions in symptom scores by comparing symptom reports at the point of first app use, with consecutive symptom reports provided throughout 2 months of app use. This study also explored whether increased app engagement was associated with greater reductions in symptoms by grouping participants according to the number of weeks they engaged with the app within the 2-month period.

### **Hypotheses:**

- Participants will report statistically significant reductions in symptoms after 2 months of app usage, in comparison to their first symptom report provided at first use of the app.
- Participants who engage more with the app across the 2-month span will report greater reductions in symptoms over time than those who engage less with the app, after controlling for covariates.

## **Methods**

### *Design & Participants*

This study used a quasi-experimental design to measure change in symptom scores across 2-months of app use. We included women who downloaded the Health & Her app, had consented to their data being used for research purposes, and had reported their symptoms at baseline and after 2 months. Applying this inclusion criteria to over 150,000 women who had downloaded the app and had answered the onboarding questions (i.e., had answered all prerequisite questions in order to access the app's facilities), we arrived at a final sample of 1,900 women, who collectively provided a total of 31,076 distinct symptom observations. These individuals recorded their symptoms via the app between October 2020 and January 2023. Participants were grouped according to the number of weeks they engaged with the app; engagement was defined as using the app to log a symptom, period, trigger, or to complete an in-app activity. Therefore, levels of engagement ranged from 2 weeks (i.e., they logged symptoms in the first and last week of the 2-month period) to 9 weeks (i.e., they logged symptoms each week of the 2-month period). Thus, this study encompassed 8 distinct app engagement groups: 2 weeks, 3 weeks, 4 weeks, 5 weeks, 6 weeks, 7 weeks, 8 weeks, and 9 weeks. The repeated measures variable were symptom scores, which were calculated for each day participants logged their symptoms. The dependent variable was symptom change scores, which was calculated by subtracting each consecutive symptom score from the baseline symptom score, until the final one provided by all participants at 2-months. As participants varied in the number of days they logged their symptoms via the app, the present study used an unbalanced design. For example, some participants may have provided 62 symptom scores (i.e., they had logged every day of the 2-month period), whereas others may have 2 symptom scores (i.e., they had logged symptoms at the beginning and end of the 2-month period only). To account for this imbalance, the main analysis involved a linear mixed effects model. Women were made aware of the app through social media adverts, the Health & Her website, word of mouth, the IOS app store (<https://apps.apple.com/gb/app/health-her-menopause-app/id1519199698>), Google Play Store ([https://play.google.com/store/apps/details?id=com.healthandher&hl=en\\_GB&gl=US](https://play.google.com/store/apps/details?id=com.healthandher&hl=en_GB&gl=US)), or through seeing app advertisements on Health & Her brand supplements bought in store or online through a retailer or directly from the Health & Her website. Health & Her advertisements are designed to focus on women of perimenopausal and menopausal age, who have indicated an online interest in menopause, and who live in the United Kingdom. The app is freely available on IOS and android via the app store or Google play store. All data were fully anonymised prior to analysis.

### Ethics:

All participants provided informed consent for their data to be included in the present study. The present study was approved by the University of South Wales ethical review board.

### *The Health & Her app:*

After first downloading and opening the app, users are asked to engage with an onboarding process which asks users to provide information on their age, medical history, HRT use, hormonal contraceptive use, menopausal status, dietary supplement usage and current menopausal symptoms. Once all onboarding questions have been answered users are given the opportunity to begin tracking their menopausal symptoms, as well as their symptom

1  
2  
3 triggers and menstrual cycles if they are still experiencing periods. Users are also given the  
4 opportunity to create a plan by setting daily goals using digital in-app activities designed to  
5 improve menopausal symptoms and heighten psychological wellbeing. Activities include  
6 CBT exercises (CBT for loss of sex drive, CBT for low mood, CBT for hot flushes), a guided  
7 sleep meditation exercise, a paced-breathing exercise, stress & anxiety meditation exercise, a  
8 pelvic floor exercise timer, drink water reminders, and HRT and supplement reminders.  
9 Triggers include lifestyle and situational factors which could increase or worsen symptoms,  
10 such as stress at work, alcohol consumption, and smoking. The app also provides women  
11 with articles to help them learn more about menopause, and strategies they can undertake to  
12 help them manage their symptoms. Women are encouraged to return to the app to track their  
13 symptoms, periods, and symptom triggers, or complete digital activities through scheduled  
14 push notifications (if the user has enabled notifications on their mobile device).  
15  
16  
17

### 18 *Symptom Improvement:*

19  
20  
21 Health & Her app users are invited to report their menopausal symptoms and concurrent  
22 symptom severities using a list of 22 common menopausal symptoms. Symptom severities  
23 range from 1 (mild), 2 (moderate), to 3 (severe). Figure 1 shows menopausal symptoms and  
24 their frequency distributions in the cohort. Symptom scores were calculated for each instance  
25 the user logged their symptoms by multiplying total number of symptoms with their average  
26 symptom severity e.g., Hot Flushes (severity=1), Sleeping Problems (severity=2), Night  
27 Sweats (severity=3) would result in a total symptom score of =6. A continuous symptom  
28 difference score was calculated to examine how symptoms increased or decreased throughout  
29 the 2-month app usage period. Therefore, a symptom score was calculated for each instance  
30 users input their symptoms into the app, and symptom change scores were calculated by  
31 subtracting each consecutive symptom score from the baseline symptom score, up until  
32 endpoint at 2-months.  
33  
34

### 35 *Engagement:*

36  
37  
38 App engagement was quantified by counting the number of distinct weeks users engaged  
39 with the app (*Weeks Engaged*) to log symptoms, triggers, periods, or complete in-app  
40 activities within the 2-month span. Factors relating to app usage were assessed to evaluate  
41 and control for their independent effects, including daily use of symptom logging, trigger  
42 logging, reporting menstrual periods, and use of activities featured within the app. The total  
43 number of days women logged their symptoms, logged symptom triggers, logged periods, or  
44 completed in-app activities across the 2-month period were examined as continuous  
45 variables.  
46  
47

### 48 *Covariates:*

49  
50  
51 Covariates were included to control for their effects on symptom improvement and heighten  
52 statistical accuracy, reduce bias, and enable a more accurate representation of the effects of  
53 app engagement.  
54 The following covariates were added as dichotomous Yes/No variables: HRT usage,  
55 hormonal contraceptive usage, current self-reported medical conditions (e.g., PCOS, fibroids,  
56 endometriosis, PMS/PMDD, pre/postnatal depression, gestational diabetes, depression,  
57 anxiety, cancer, adenomyosis, autoimmune diseases, premature ovarian failure). Age was  
58 added as a continuous variable. As the Health & Her app is advertised alongside the Health &  
59 Her brand supplements, it was important to evaluate variances in outcomes among women  
60 who used Health & Her supplements. Therefore, supplement use was compared as a factor



with 4 levels, Not using any Supplements, External Supplements (i.e., using a brand other than Health & Her's), using Health & Her brand supplements only, and using both Health & Her and External Supplements. It was important to control for the effects of using Health & Her brand supplements in order to account for placebo or expectation effects among Health & Her supplement customers.

To control for individual variations in symptom reporting, baseline symptom scores were added as covariates. However, to evaluate the independent effect of specific symptom types reported at baseline, baseline symptom scores were split according to Physical symptoms at baseline= *Headaches, Digestive Issues, Bloating, Dizziness, Skin Changes, Joint Aches, Period Changes, Palpitations, Weight Gain*; Psychological symptoms at baseline= *Low Mood, Stress & Anxiety, Low Energy, Brain Fog, Memory Loss, Poor Concentration*; Urogenital symptoms at baseline= *Sensitive Bladder, Vaginal Dryness, Painful Sex, Loss of Sex Drive*; and Vasomotor symptoms at baseline= *Hot Flushes, Night Sweats, Sleeping Problems*.

## Data Analyses

No data were missing from the final sample. The anonymised data was directly obtained by the lead author from Health & Her's databank, hosted on Amazon Web Services (AWS; available at: <https://aws.amazon.com>). Statistical analyses were computed via R Studio version 4.02 (7). The main analysis involved a linear mixed effects model, which was computed using R package 'lme4' (8). To control for individual variances, participant ID was added as a random effect. A forest plot was developed using R package SjPlot (9) to visually assess the direction of the effects of all predictor variables. Using R package 'emmeans' (10), a pairwise comparison plot was computed, which visually depicted symptom changes at the beginning and end of the 2-month period for each weekly engagement group, whilst controlling for the effects of covariates. As it is not recommended to compare CIs side by side in mixed methods designs, comparison arrows were computed to visualise significant within-group differences (10). Frequency counts (N, %) were computed to assess the distribution of menopausal status, menopausal symptoms, app usage variables, current comorbidities, and medication use across the present sample. Differences between weekly app engagement groups in terms of sample characteristics were established via Kruskal-Wallis rank sum tests (for Age, Days Engaged in Symptom logging/ Trigger logging/ Period logging/ use of in-app Activities and Baseline/ Follow-up Symptom Score) and Pearson's Chi-squared tests (for HRT use, Supplement use, and Contraceptive use, and Current Comorbidities) using R package gtSummary (11). Benjamini & Hochberg p-value corrections were applied to control for the effects of multiple comparisons.

### Power:

Using R package 'simr' (12) a power analysis was calculated to assess the extent to which the present sample size could accurately detect true significant effects of weekly engagement. This analysis demonstrated that our study had 99.80% (95% CI [99.42, 99.96]) power in detecting the true effects of weekly app engagement.

## Results

### Sample Characteristics

1  
2  
3  
4 The mean age of participants was 48 (SD=4.7). Most participants were perimenopausal  
5 (n=1402, 74%), 16% (n=298) of participants were unsure of their menopausal status due to  
6 using HRT or hormonal contraceptives, 9% (n=181) were menopausal, and a small number  
7 were postmenopausal (n=19, <1%). Approximately half reported medical comorbidities  
8 (53%) and 53% were not currently using dietary supplements. The average time between first  
9 and final symptom log was 60.35 (SD=1.96) days. As shown in Figure 1, the most common  
10 menopausal symptoms were Low Energy (65%), Low Mood (59%), Sleeping Problems  
11 (58%), Stress & Anxiety (58%), whereas least common symptoms included Painful Sex  
12 (16%) and Vaginal Dryness (28%).  
13  
14

15  
16 Figure 1: Menopausal symptom distributions across the full sample:

17  
18 INSERT FIGURE 1 HERE  
19

20  
21  
22 **Between Group Variances:** Table 1 shows the differences in scores between the app  
23 engagement groups for the present sample. Participants varied between groups in terms of  
24 age: women who engaged with the app for 2 or 3 weeks tended to be older than women who  
25 engaged for 4 weeks or more ( $p < .001$ ). The groups also differed in app usage. Frequency of  
26 days women logged Symptoms, Periods, Activities, and Triggers increased according to the  
27 number of Weeks Engaged ( $p < .001$ ). Final symptom scores were statistically lower as  
28 Weeks Engaged increased ( $p < .001$ ). Upon adjustment of multiple comparison testing,  
29 participants did not vary in terms of other sample characteristics.  
30  
31  
32  
33  
34  
35  
36  
37  
38  
39  
40  
41  
42  
43  
44  
45  
46  
47  
48  
49  
50  
51  
52  
53  
54  
55  
56  
57  
58  
59  
60

Table 1: Between Group Variances:

| Variable               | Total Weeks Engaged             |                         |                         |                         |                         |                         |                         |                         |                         | q-value <sup>2,3</sup> |
|------------------------|---------------------------------|-------------------------|-------------------------|-------------------------|-------------------------|-------------------------|-------------------------|-------------------------|-------------------------|------------------------|
|                        | Overall, N = 1,900 <sup>1</sup> | 2, N = 495 <sup>1</sup> | 3, N = 253 <sup>1</sup> | 4, N = 171 <sup>1</sup> | 5, N = 170 <sup>1</sup> | 6, N = 137 <sup>1</sup> | 7, N = 132 <sup>1</sup> | 8, N = 129 <sup>1</sup> | 9, N = 413 <sup>1</sup> |                        |
| Age                    | 48.1 (4.7)                      | 48.9 (4.8)              | 48.7 (4.8)              | 47.6 (4.5)              | 47.0 (4.9)              | 47.6 (4.0)              | 46.5 (5.0)              | 47.6 (4.7)              | 48.2 (4.5)              | <0.001                 |
| HRT Use                | 227 (12%)                       | 72 (15%)                | 28 (11%)                | 20 (12%)                | 18 (11%)                | 11 (8.0%)               | 17 (13%)                | 15 (12%)                | 46 (11%)                | 0.5                    |
| Contraceptive Use      | 343 (18%)                       | 102 (21%)               | 50 (20%)                | 22 (13%)                | 27 (16%)                | 18 (13%)                | 27 (20%)                | 19 (15%)                | 78 (19%)                | 0.2                    |
| Not using Supplements  | 1,003 (53%)                     | 268 (54%)               | 142 (56%)               | 96 (56%)                | 89 (52%)                | 73 (53%)                | 63 (48%)                | 71 (55%)                | 201 (49%)               | 0.3                    |
| Current Comorbidities  | 1,010 (53%)                     | 267 (54%)               | 143 (57%)               | 84 (49%)                | 98 (58%)                | 73 (53%)                | 73 (55%)                | 50 (39%)                | 222 (54%)               | 0.061                  |
| Symptom Logs           | 16 (17)                         | 2 (1)                   | 5 (2)                   | 7 (3)                   | 10 (4)                  | 15 (6)                  | 18 (6)                  | 25 (9)                  | 44 (13)                 | <0.001                 |
| Trigger Logs           | 10 (13)                         | 2 (1)                   | 3 (2)                   | 4 (3)                   | 6 (4)                   | 8 (7)                   | 11 (6)                  | 14 (12)                 | 27 (18)                 | <0.001                 |
| Activity Logs          | 4 (10)                          | 1 (1)                   | 2 (3)                   | 2 (6)                   | 2 (5)                   | 4 (9)                   | 5 (11)                  | 5 (10)                  | 10 (17)                 | <0.001                 |
| Period Logs            | 3 (3)                           | 1 (1)                   | 2 (2)                   | 2 (2)                   | 3 (3)                   | 3 (3)                   | 4 (3)                   | 3 (3)                   | 4 (5)                   | <0.001                 |
| Baseline Symptom Score | 17 (13)                         | 18 (14)                 | 17 (14)                 | 16 (14)                 | 15 (13)                 | 16 (13)                 | 18 (13)                 | 15 (12)                 | 16 (12)                 | 0.2                    |
| Final Symptom Score    | 12 (12)                         | 15 (14)                 | 13 (12)                 | 12 (12)                 | 12 (12)                 | 11 (11)                 | 11 (10)                 | 10 (10)                 | 9 (8)                   | <0.001                 |

<sup>1</sup> Mean (SD) or Frequency (%)

<sup>2</sup> Kruskal-Wallis rank sum test; Pearson's Chi-squared test

<sup>3</sup> Benjamini & Hochberg correction for multiple testing

**Linear Mixed Effects Model:** Table 2 shows the summary statistics from the linear mixed effects model which examined the effects of Weeks Engaged, app-usage variables, and covariates on symptom changes across the 2-month period.

Table 2: Linear Mixed Effects Model of Predictors of Symptom Change Scores:

| Characteristic                 | $\beta$      | 95% CI <sup>1</sup> |
|--------------------------------|--------------|---------------------|
| <b>Urogenital Symptoms</b>     | <b>-0.46</b> | <b>-0.61, -0.32</b> |
| <b>Vasomotor Symptoms</b>      | <b>-0.45</b> | <b>-0.58, -0.32</b> |
| <b>Psychological Symptoms</b>  | <b>-0.54</b> | <b>-0.62, -0.46</b> |
| <b>Physical Symptoms</b>       | <b>-0.42</b> | <b>-0.50, -0.34</b> |
| <b>Age</b>                     | 0.00         | -0.06, 0.06         |
| <b>HRT</b>                     | -0.24        | -1.1, 0.62          |
| <b>Supplements</b>             |              |                     |
| None                           | —            | —                   |
| Both                           | -0.54        | -1.6, 0.55          |
| External Only                  | 0.39         | -0.24, 1.0          |
| Health & Her Only              | <b>-1.3</b>  | <b>-2.2, -0.35</b>  |
| <b>Hormonal Contraceptives</b> | -0.01        | -0.73, 0.72         |
| <b>Current Comorbidities</b>   | <b>0.94</b>  | <b>0.38, 1.5</b>    |
| <b>Trigger Logs</b>            | <b>0.05</b>  | <b>0.02, 0.08</b>   |
| <b>Activity Logs</b>           | <b>-0.03</b> | <b>-0.06, -0.01</b> |
| <b>Period Logs</b>             | <b>-0.12</b> | <b>-0.21, -0.03</b> |
| <b>Symptom Logs</b>            | <b>-0.06</b> | <b>-0.10, -0.01</b> |
| <b>Weeks Engaged</b>           |              |                     |
| 2                              | —            | —                   |
| 3                              | <b>-1.2</b>  | <b>-2.2, -0.26</b>  |
| 4                              | <b>-2.7</b>  | <b>-3.8, -1.6</b>   |
| 5                              | <b>-2.6</b>  | <b>-3.7, -1.5</b>   |
| 6                              | <b>-3.3</b>  | <b>-4.5, -2.0</b>   |
| 7                              | <b>-3.2</b>  | <b>-4.5, -1.8</b>   |
| 8                              | <b>-3.8</b>  | <b>-5.2, -2.3</b>   |
| 9                              | <b>-4.0</b>  | <b>-5.8, -2.3</b>   |

<sup>1</sup> CI = Confidence Interval

These findings indicate that increasing Weeks Engaged is statistically significantly associated with lower symptom total: at 3 weeks,  $\beta=-1.2$ , 95% CI [-2.2, -0.26], 4 weeks  $\beta=-2.7$  [-3.8, -1.6], 5 weeks  $\beta=-2.6$  [-3.7, -1.5], 6 weeks  $\beta=-3.3$  [-4.5, -2.0], 7 weeks  $\beta=-3.2$  [-4.5, -1.8], 8 weeks  $\beta=-3.8$  [-5.2, -2.3] and 9 weeks  $\beta=-4.0$  [-5.8, -2.3]. Beta statistics indicate that app engagement predicted greater reductions in symptoms as the number of Weeks Engaged increased. Reporting a current comorbidity  $\beta= 0.94$  [0.38, 1.5] and Trigger logging were predictive of increased symptom scores  $\beta= 0.05$  [0.02, 0.08] whereas Symptom logging  $\beta= -0.06$  [-0.10, -0.01], Period logging  $\beta= -0.12$  [-0.21, -0.03], and completing in-app Activities were related to reduced symptoms  $\beta= -0.03$  [-0.06, -0.01]. Taking a Health & Her brand supplement was also related to reduced symptoms  $\beta= -1.3$  [-2.2, -0.35].

1  
2  
3 Out of the four symptom domains, reporting Psychological Symptoms at baseline was  
4 associated with the greatest symptom reductions  $\beta = -0.54$  [-0.62, -0.46], whereas Physical  
5 symptoms at baseline were associated with the smallest effect on symptom reductions  $\beta = -$   
6 0.42 [-0.5, -0.34].

7  
8 Figure 2 shows the point estimates of the effects of predictors on symptom change scores  
9 from baseline. Confidence intervals are wide within the weekly engagement groups,  
10 suggesting high variability in symptom scores. The forest plot demonstrates the linear  
11 association between Weeks Engaged and reduced symptoms.  
12

13  
14 Figure 2: Correlation Forest Plot Depicting Effects of all Model Predictors on Symptom  
15 Changes:  
16

17 **INSERT FIGURE 2 HERE**  
18  
19  
20  
21

22 **Pairwise comparisons:** Figure 3 demonstrates the differences in symptoms before and after  
23 2-months of app use according to number of weeks women engaged with the app. Within  
24 each of the engagement groups there were statistically significant reductions in symptoms  
25 after 2-months, indicated by the lack of overlap between the red comparison arrows. As total  
26 number of engagement weeks increased, reductions in symptoms after 2-months of app use  
27 became larger.  
28  
29  
30  
31  
32  
33  
34  
35  
36  
37  
38  
39  
40  
41  
42  
43  
44  
45  
46  
47  
48  
49  
50  
51  
52  
53  
54  
55  
56  
57  
58  
59  
60

1  
2  
3 Figure 3: Pairwise Comparisons of Pre/Post Variances in Symptom Scores by Number of Weeks Engaged:  
4  
5

6 INSERT FIGURE 3 HERE.  
7  
8  
9  
10  
11  
12  
13  
14  
15  
16  
17  
18  
19  
20  
21  
22  
23  
24  
25  
26  
27  
28  
29  
30  
31  
32  
33  
34  
35  
36  
37  
38  
39  
40  
41  
42  
43  
44  
45  
46

For peer review only

## **Discussion**

These findings demonstrate that use of the Health & Her app for 2-months was associated with reduced menopausal symptoms. Moreover, women who engaged with the app more frequently across the 2-month period reported greater reductions in symptoms than women who engaged for fewer weeks. These findings remained significant after controlling for covariates such as HRT use, hormonal contraceptive use, supplement use, age, and current comorbidities.

Although symptoms significantly decreased regardless of the number of weeks women engaged with the app, the more women engaged with the app the greater their reductions in symptoms. Notably, women who engaged more with the app reported more use of the app's features, suggesting that improvements could be attributed to greater combined utilisation of the app's facilities such as logging periods, triggers, in-app activities, and monitoring symptoms. The total number of days spent monitoring symptoms independently predicted symptom reductions. This is in-line with prior research which has demonstrated that symptom monitoring can result in reductions in menopausal symptoms (5,6). However, combined weekly engagement with the app was associated with greater reductions in symptoms than symptom monitoring alone, suggesting that using multiple facets of the Health & Her app can bestow greater benefits to the user.

Logging symptom triggers via the app was associated with increased symptoms. This was an expected outcome, given that symptom triggers act as a measure of experiences and behaviour. For example, triggers include alcohol, stress at work, and smoking, and these factors can all negatively influence symptoms (15). However, given that trigger reporting increased as app engagement increased, it is likely that combining trigger logging with the other facets of the app (logging symptoms, logging periods, using in-app activities etc.) contributed to improvements over time because women noted the links between their symptom triggers and symptom outcomes.

As with prior research (4), completion of in-app activities was significantly associated with reduced symptoms. It is possible that use of activities had a larger impact on symptoms than shown in the present study, as women may have completed activities through notification prompts (e.g. drink water reminders, pelvic floor exercises), foregoing the need to access the app to complete and record their activity completion. This would explain why low engagers reported statistically significant reductions in symptoms after 2-months.

Logging periods was also associated with symptom reductions, which supports Zhaunova et al's (3) findings. This could suggest that women in the early stage of perimenopause, and therefore still experiencing regular periods, might experience greater benefits from the app than postmenopausal women. Furthermore, women who engaged less with the app were older than more frequent users.

Of the four symptom domains evaluated, reporting psychological symptoms at baseline was associated with the greatest reductions in symptom scores. This outcome is supported by Andrews et al's (6) randomised trial, which demonstrated that daily symptom monitoring was associated with reductions in anxiety, brain fog, low energy, and poor concentration, all of which were assessed as psychological symptoms in the present study.

Given that the most frequent symptoms among this sample included low energy, low mood, and stress and anxiety, this might suggest that app usage is most adhered to by women with predominantly psychological symptoms, and given that psychological symptoms showed the largest benefits from app usage, this may incentivise women with these types of symptoms to continue engaging with the app. As HRT is not indicated for improving psychological

1  
2  
3 symptoms, this finding may provide support for using the Health & Her app as an adjunct to  
4 HRT (2).

5 A notable outcome was that Health & Her brand supplement use was associated with  
6 symptom reductions. The improvements may have been related to the beneficial impact of  
7 taking the supplements. Vitamin D supplementation, a key ingredient of Health & Her's  
8 supplements, has been demonstrated among menopausal women (13). Alternatively, this  
9 outcome may be related to placebo effects, as individuals who had recently started taking  
10 Health & Her supplements may have had a positive expectation that the supplement will lead  
11 to better health outcomes, and these expectations may have manifested as self-reported health  
12 improvements (14).  
13  
14  
15  
16

### 17 **Strengths, Limitations & Future Directions:**

18  
19 A key strength of this study was that it utilised a large participant sample (N=1,900) of  
20 women with menopausal symptoms, improving the external validity of these findings. The  
21 present study showed clear evidence that increased engagement in the Health & Her app was  
22 related to improved symptoms, as established by analyses which controlled for multiple  
23 factors known to influence symptoms during menopause, and random variances within  
24 individual app users.  
25

26 A limitation was the observational design, which restricted the data to that which participants  
27 chose to input into the app. Therefore this study is at risk of unmeasured confounding bias as  
28 it was also not possible to determine whether participants had any characteristics that were  
29 not captured by the app i.e., impact of notifications which remind users to engage in positive  
30 health behaviours, reading in-app health articles, recent medical help seeking, use of  
31 medications not listed by the app, comorbidities not listed by the app, or ethnicity and other  
32 demographic variables. Therefore, a key future direction would be to conduct a controlled  
33 study assessing app use with clear parameters in terms of adherence to app usage, and  
34 characteristics such as age, menopausal symptoms, and menopausal status. However, given  
35 that statistical differences were found in the present study, in the directions expected, this  
36 suggests that the benefits of using the Health & Her app to manage symptoms during the  
37 menopause transition are robust.  
38  
39

40 Additionally, because the present sample predominantly reported psychological symptoms,  
41 and these types of symptoms were associated with larger improvements than the other  
42 symptom domains (e.g., physical, urogenital and sexual, vasomotor and sleep), this might  
43 suggest that app usage is most effective for women with these symptom characteristics.  
44 Therefore, future research should further investigate the impact of Health & Her app usage on  
45 specific symptom types to evaluate these outcomes.  
46

47 The improvements in psychological symptoms could be related to the Health & Her app  
48 providing women with several activities designed to alleviate stress and psychological  
49 symptoms (i.e., digital CBT exercise for low mood, deep breathing exercises, and a stress and  
50 anxiety mediation exercise), as well as content designed to empower women during  
51 menopause. While out of scope for the present study, subsequent research assessing the  
52 Health & Her app will aim to examine the impact of individual activities on symptom  
53 reductions.  
54

55 Health & Her supplement usage was associated with reductions in symptoms. This may  
56 suggest that app usage enhanced the effects of taking supplements, or vice versa, as women  
57 tracked their symptom changes and recognised the improvements which in turn further  
58 encouraged them to engage with the app. Thus, further research is needed to establish the  
59 impact of using the app as an adjunct to menopause-specific treatments.  
60



## Conclusions:

This study demonstrated that use of Health & Her's app for a 2-month period was associated with symptom reductions among 1,900 app users. Given the large sample size, this suggests these findings are generalisable to menopausal women. Moreover, greater weekly engagement with the app was associated with greater reductions in symptoms. These results support previous findings which have suggested that symptom monitoring and use of digital tools which facilitate period logging, and health-promoting digital activities can be beneficial for improving health outcomes, especially relating to psychological complaints (5,6,3,4). However, these findings are limited by the observational study design. Therefore, future research should conduct a fully controlled study to further understand the effects of using the Health & Her app to improve health during menopause, with a focus on exploring the app as an adjunct to menopause-specific treatments.

In light of these findings, it is recommended that women be made aware of the benefits of using digital health apps by health providers treating women in need of support for menopausal symptoms, to help them manage their menopausal symptoms and track the impact of treatments.

**Acknowledgements:** We the authors would like to thank Dr Rebecca Tomlinson for providing her insights on this research using her perspective as a General Practitioner and menopause specialist.

**Funding:** This study was funded by Health & Her.

**Competing interests:** RA is employed by Health & Her. KB is the CEO and co-founder of Health & Her. AL is employed by Health & Her on a contractual basis. DL has received honoraria and expenses from Gedeon Richter: Preglem for expert speaker and web contributions.

**Author contributions:** RA was responsible for conceptualising the study, analysing the data, and preparing the manuscript. DL was responsible for reviewing the manuscript and consulting on the design and analyses. KB was responsible for conceptualising the study and reviewing the manuscript. AL consulted on the study design and data analyses and reviewed the manuscript.

**Data Access:** The data used in the present study is not to be made publicly available and is the intellectual property of Health & Her.

## References

1. Mishra GD, Kuh D. Health symptoms during midlife in relation to menopausal transition: British prospective cohort study. *BMJ*. 2012 Feb 8;344:e402.
2. Overview | Menopause: diagnosis and management | Guidance | NICE [Internet]. NICE; [cited 2022 Oct 7]. Available from: <https://www.nice.org.uk/guidance/ng23>
3. Zhaunova L, Bamford R, Radovic T, Wickham A, Peven K, Croft J, et al. Characterisation of self-reported improvements in education and health among users of Flo period tracking

- 1  
2  
3 app: cross-sectional survey [Internet]. OSF Preprints; 2022 [cited 2022 Nov 22]. Available  
4 from: <https://osf.io/vhn6x/>  
5  
6  
7 4. McCloud T, Jones R, Lewis G, Bell V, Tsakanikos E. Effectiveness of a Mobile App  
8 Intervention for Anxiety and Depression Symptoms in University Students: Randomized  
9 Controlled Trial. *JMIR MHealth UHealth*. 2020 Jul 31;8(7):e15418.  
10  
11 5. Andrews R, Hale G, John B, Lancaster D. Evaluating the Effects of Symptom Monitoring  
12 on Menopausal Health Outcomes: A Systematic Review and Meta-Analysis. *Front Glob*  
13 *Womens Health*. 2021;2.  
14  
15 6. Andrews RAF, John B, Lancaster D. Symptom monitoring improves physical and  
16 emotional outcomes during menopause: a randomized controlled trial. *Menopause*. 2023  
17 Mar;30(3):267.  
18  
19 7. R Studio Team. RStudio: integrated development for R. RStudio, PBC, Boston, MA. 2020.  
20 2021.  
21  
22 8. Bates D, Maechler M, Bolker B, Walker S. Fitting linear mixed-effects models using lme4.  
23 *Journal of Statistical Software* 67: 1–48. 2015;  
24  
25 9. Lüdtke D, Bartel A, Schwemmer C, Powell C, Djalovski A, Titz J. sjPlot: Data  
26 Visualization for Statistics in Social Science [Internet]. 2022 [cited 2022 Oct 24].  
27 Available from: <https://CRAN.R-project.org/package=sjPlot>  
28  
29 10. Lenth R, Singmann H, Love J, Buerkner P, Herve M. Emmeans: Estimated marginal  
30 means, aka least-squares means. R Package Version. 2018;1(1):3.  
31  
32 11. Sjoberg DD, Curry M, Hannum M, Whiting K, Zabor EC. gtsummary: Presentation-  
33 ready data summary and analytic result tables. *Publ Online*. 2020;  
34  
35 12. Green P, MacLeod CJ. SIMR: an R package for power analysis of generalized linear  
36 mixed models by simulation. *Methods Ecol Evol*. 2016;7(4):493–8.  
37  
38 13. Pérez-López FR, Chedraui P, Pilz S. Vitamin D supplementation after the menopause.  
39 *Ther Adv Endocrinol Metab*. 2020;11:2042018820931291.  
40  
41 14. Paranjpe MD, Chin AC, Paranjpe I, Reid NJ, Duy PQ, Wang JK, et al. Self-reported  
42 health without clinically measurable benefits among adult users of multivitamin and  
43 multimineral supplements: a cross-sectional study. *BMJ Open*. 2020;10(11):e039119.  
44  
45 15. Noll PR e S, Noll M, Zangirolami-Raimundo J, Baracat EC, Louzada ML da C, Soares  
46 Júnior JM, et al. Life habits of postmenopausal women: Association of menopause  
47 symptom intensity and food consumption by degree of food processing. *Maturitas*. 2022  
48 Feb 1;156:1–11.  
49  
50  
51  
52  
53  
54  
55  
56  
57  
58  
59  
60

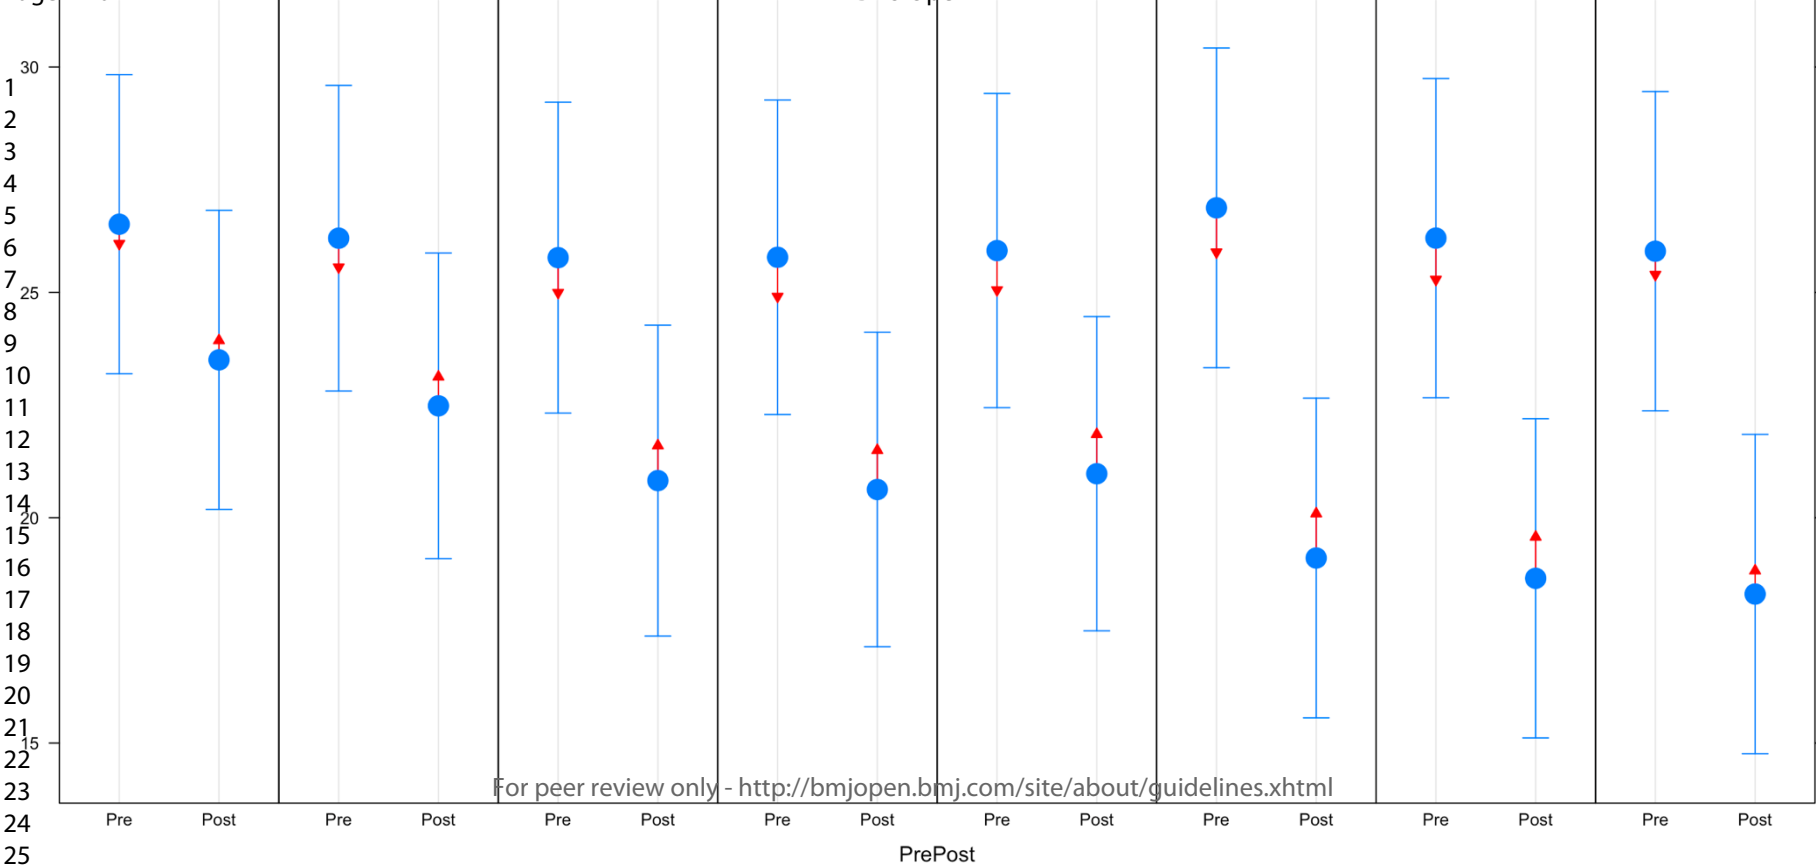

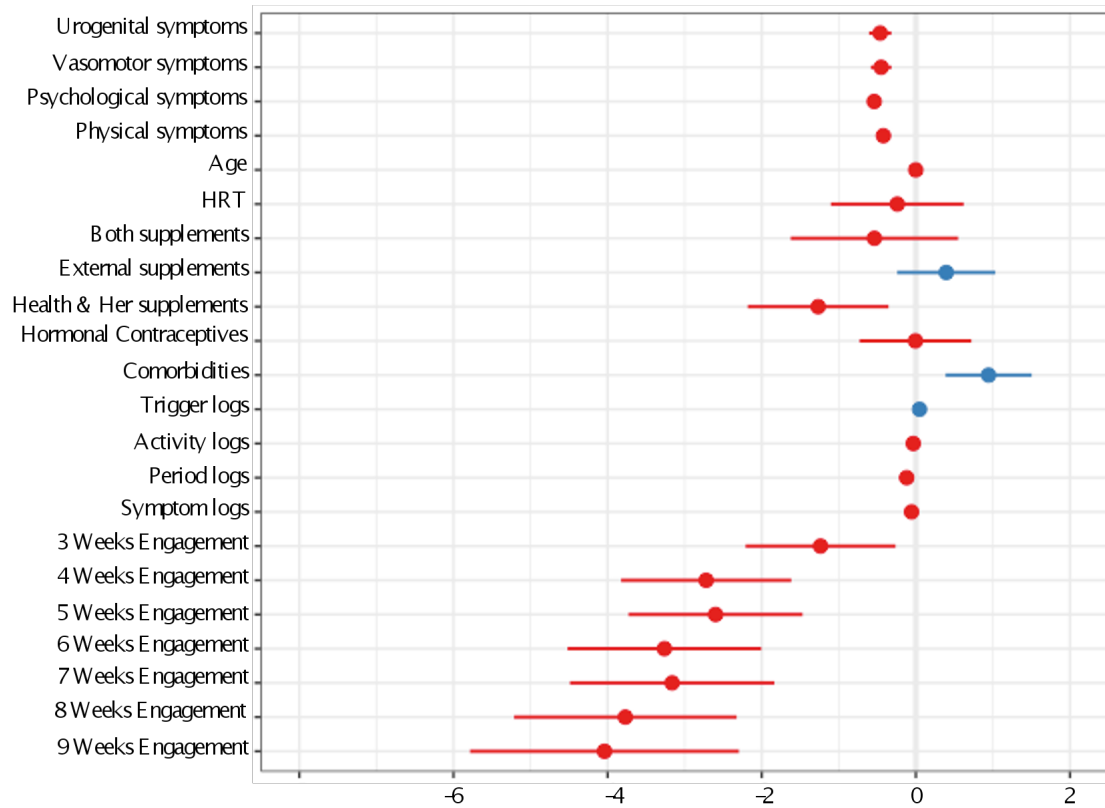

1  
2  
3  
4  
5  
6  
7  
8  
9  
10  
11  
12  
13  
14  
15  
16  
17  
18  
19  
20  
21  
22  
23  
24  
25  
26  
27  
28  
29  
30  
31  
32  
33  
34  
35  
36  
37  
38  
39  
40  
41

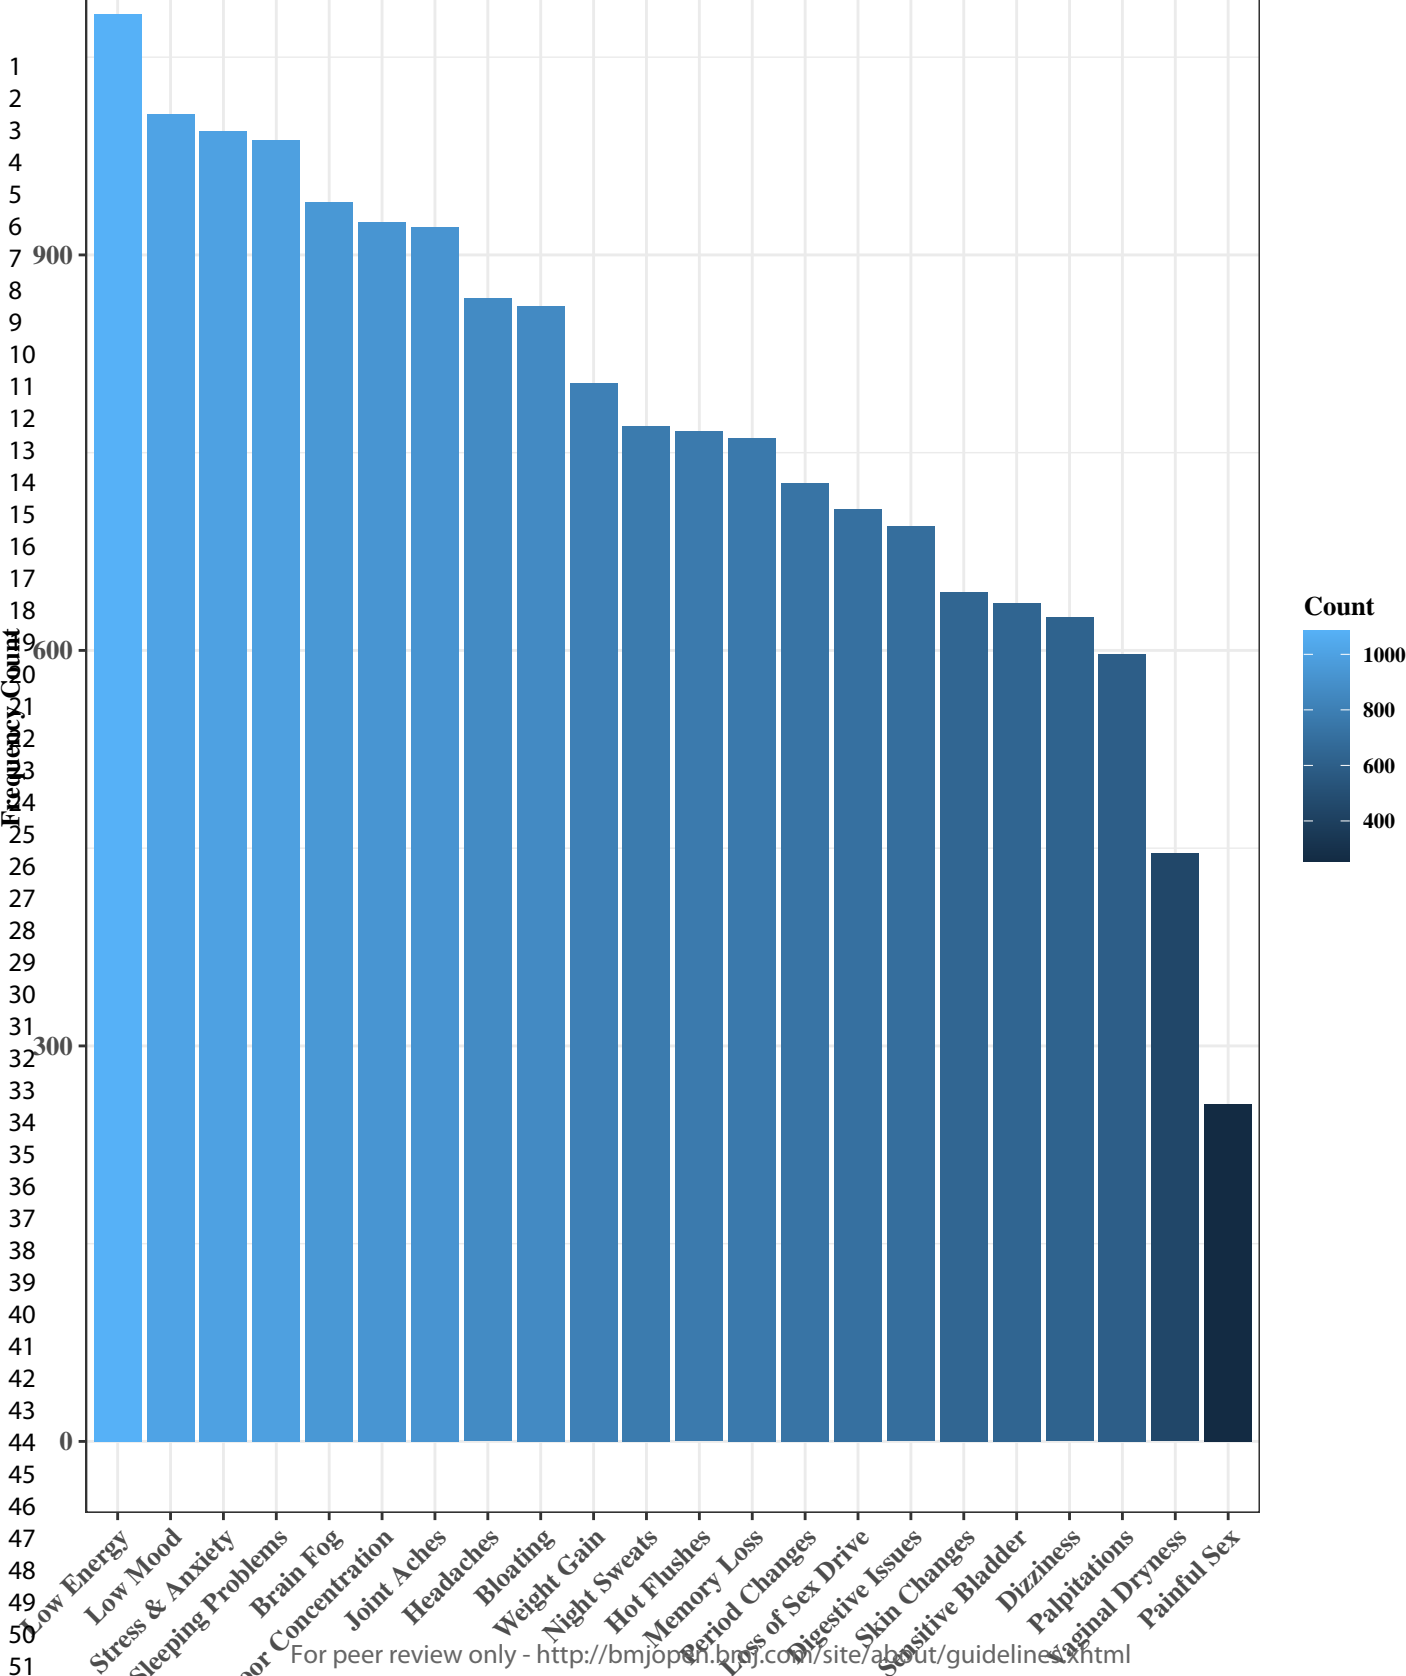

# Reporting checklist for cohort study.

Based on the STROBE cohort guidelines.

## Instructions to authors

Complete this checklist by entering the page numbers from your manuscript where readers will find each of the items listed below.

Your article may not currently address all the items on the checklist. Please modify your text to include the missing information. If you are certain that an item does not apply, please write "n/a" and provide a short explanation.

Upload your completed checklist as an extra file when you submit to a journal.

In your methods section, say that you used the STROBE cohort reporting guidelines, and cite them as:

von Elm E, Altman DG, Egger M, Pocock SJ, Gøtzsche PC, Vandenbroucke JP. The Strengthening of Reporting of Observational Studies in Epidemiology (STROBE) Statement: guidelines for reporting observational studies.

|                           |                     |                                                                                                 | Page<br>Number |
|---------------------------|---------------------|-------------------------------------------------------------------------------------------------|----------------|
| <b>Title and abstract</b> |                     |                                                                                                 |                |
| Title                     | <a href="#">#1a</a> | Indicate the study's design with a commonly used term in the title or the abstract              | 1              |
| Abstract                  | <a href="#">#1b</a> | Provide in the abstract an informative and balanced summary of what was done and what was found | 2              |
| <b>Introduction</b>       |                     |                                                                                                 |                |
| Background / rationale    | <a href="#">#2</a>  | Explain the scientific background and rationale for the investigation being reported            | 3              |
| Objectives                | <a href="#">#3</a>  | State specific objectives, including any prespecified hypotheses                                | 3              |
| <b>Methods</b>            |                     |                                                                                                 |                |
| Study design              | <a href="#">#4</a>  | Present key elements of study design early in the paper                                         | 4              |
| Setting                   | <a href="#">#5</a>  | Describe the setting, locations, and relevant dates, including periods                          | 4              |

|    |                      |                      |                                                                                                                                                                                                                                                                      |    |
|----|----------------------|----------------------|----------------------------------------------------------------------------------------------------------------------------------------------------------------------------------------------------------------------------------------------------------------------|----|
| 1  |                      |                      | of recruitment, exposure, follow-up, and data collection                                                                                                                                                                                                             |    |
| 2  |                      |                      |                                                                                                                                                                                                                                                                      |    |
| 3  | Eligibility criteria | <a href="#">#6a</a>  | Give the eligibility criteria, and the sources and methods of selection of participants. Describe methods of follow-up.                                                                                                                                              | 4  |
| 4  |                      |                      |                                                                                                                                                                                                                                                                      |    |
| 5  |                      |                      |                                                                                                                                                                                                                                                                      |    |
| 6  | Eligibility criteria | <a href="#">#6b</a>  | For matched studies, give matching criteria and number of exposed and unexposed                                                                                                                                                                                      | 4  |
| 7  |                      |                      |                                                                                                                                                                                                                                                                      |    |
| 8  |                      |                      |                                                                                                                                                                                                                                                                      |    |
| 9  |                      |                      |                                                                                                                                                                                                                                                                      |    |
| 10 | Variables            | <a href="#">#7</a>   | Clearly define all outcomes, exposures, predictors, potential confounders, and effect modifiers. Give diagnostic criteria, if applicable                                                                                                                             | 5  |
| 11 |                      |                      |                                                                                                                                                                                                                                                                      |    |
| 12 |                      |                      |                                                                                                                                                                                                                                                                      |    |
| 13 |                      |                      |                                                                                                                                                                                                                                                                      |    |
| 14 |                      |                      |                                                                                                                                                                                                                                                                      |    |
| 15 | Data sources /       | <a href="#">#8</a>   | For each variable of interest give sources of data and details of methods of assessment (measurement). Describe comparability of assessment methods if there is more than one group. Give information separately for for exposed and unexposed groups if applicable. | 5  |
| 16 | measurement          |                      |                                                                                                                                                                                                                                                                      |    |
| 17 |                      |                      |                                                                                                                                                                                                                                                                      |    |
| 18 |                      |                      |                                                                                                                                                                                                                                                                      |    |
| 19 |                      |                      |                                                                                                                                                                                                                                                                      |    |
| 20 |                      |                      |                                                                                                                                                                                                                                                                      |    |
| 21 |                      |                      |                                                                                                                                                                                                                                                                      |    |
| 22 | Bias                 | <a href="#">#9</a>   | Describe any efforts to address potential sources of bias                                                                                                                                                                                                            | 6  |
| 23 |                      |                      |                                                                                                                                                                                                                                                                      |    |
| 24 | Study size           | <a href="#">#10</a>  | Explain how the study size was arrived at                                                                                                                                                                                                                            | 6  |
| 25 |                      |                      |                                                                                                                                                                                                                                                                      |    |
| 26 |                      |                      |                                                                                                                                                                                                                                                                      |    |
| 27 | Quantitative         | <a href="#">#11</a>  | Explain how quantitative variables were handled in the analyses. If applicable, describe which groupings were chosen, and why                                                                                                                                        | 6  |
| 28 | variables            |                      |                                                                                                                                                                                                                                                                      |    |
| 29 |                      |                      |                                                                                                                                                                                                                                                                      |    |
| 30 |                      |                      |                                                                                                                                                                                                                                                                      |    |
| 31 | Statistical          | <a href="#">#12a</a> | Describe all statistical methods, including those used to control for confounding                                                                                                                                                                                    |    |
| 32 | methods              |                      |                                                                                                                                                                                                                                                                      |    |
| 33 |                      |                      |                                                                                                                                                                                                                                                                      |    |
| 34 | 6                    |                      |                                                                                                                                                                                                                                                                      |    |
| 35 |                      |                      |                                                                                                                                                                                                                                                                      |    |
| 36 |                      |                      |                                                                                                                                                                                                                                                                      |    |
| 37 | Statistical          | <a href="#">#12b</a> | Describe any methods used to examine subgroups and interactions                                                                                                                                                                                                      | 6  |
| 38 | methods              |                      |                                                                                                                                                                                                                                                                      |    |
| 39 |                      |                      |                                                                                                                                                                                                                                                                      |    |
| 40 |                      |                      |                                                                                                                                                                                                                                                                      |    |
| 41 | Statistical          | <a href="#">#12c</a> | Explain how missing data were addressed                                                                                                                                                                                                                              | 6  |
| 42 | methods              |                      |                                                                                                                                                                                                                                                                      |    |
| 43 |                      |                      |                                                                                                                                                                                                                                                                      |    |
| 44 | Statistical          | <a href="#">#12d</a> | If applicable, explain how loss to follow-up was addressed                                                                                                                                                                                                           | 6  |
| 45 | methods              |                      |                                                                                                                                                                                                                                                                      |    |
| 46 |                      |                      |                                                                                                                                                                                                                                                                      |    |
| 47 |                      |                      |                                                                                                                                                                                                                                                                      |    |
| 48 | Statistical          | <a href="#">#12e</a> | Describe any sensitivity analyses                                                                                                                                                                                                                                    |    |
| 49 | methods              |                      |                                                                                                                                                                                                                                                                      |    |
| 50 |                      |                      |                                                                                                                                                                                                                                                                      |    |
| 51 |                      |                      |                                                                                                                                                                                                                                                                      |    |
| 52 | 6                    |                      |                                                                                                                                                                                                                                                                      |    |
| 53 |                      |                      |                                                                                                                                                                                                                                                                      |    |
| 54 | <b>Results</b>       |                      |                                                                                                                                                                                                                                                                      |    |
| 55 |                      |                      |                                                                                                                                                                                                                                                                      |    |
| 56 |                      |                      |                                                                                                                                                                                                                                                                      |    |
| 57 | Participants         | <a href="#">#13a</a> | Report numbers of individuals at each stage of study—eg numbers potentially eligible, examined for eligibility, confirmed eligible,                                                                                                                                  | NA |
| 58 |                      |                      |                                                                                                                                                                                                                                                                      |    |
| 59 |                      |                      |                                                                                                                                                                                                                                                                      |    |
| 60 |                      |                      |                                                                                                                                                                                                                                                                      |    |

included in the study, completing follow-up, and analysed. Give information separately for for exposed and unexposed groups if applicable.

|    |                   |                      |                                                                                                                                                                                                                   |
|----|-------------------|----------------------|-------------------------------------------------------------------------------------------------------------------------------------------------------------------------------------------------------------------|
| 1  |                   |                      |                                                                                                                                                                                                                   |
| 2  |                   |                      |                                                                                                                                                                                                                   |
| 3  |                   |                      |                                                                                                                                                                                                                   |
| 4  |                   |                      |                                                                                                                                                                                                                   |
| 5  | Participants      | <a href="#">#13b</a> | Give reasons for non-participation at each stage                                                                                                                                                                  |
| 6  |                   |                      | NA                                                                                                                                                                                                                |
| 7  | Participants      | <a href="#">#13c</a> | Consider use of a flow diagram                                                                                                                                                                                    |
| 8  |                   |                      |                                                                                                                                                                                                                   |
| 9  |                   |                      |                                                                                                                                                                                                                   |
| 10 | NA                |                      |                                                                                                                                                                                                                   |
| 11 |                   |                      |                                                                                                                                                                                                                   |
| 12 | Descriptive data  | <a href="#">#14a</a> | Give characteristics of study participants (eg demographic, clinical, social) and information on exposures and potential confounders. Give information separately for exposed and unexposed groups if applicable. |
| 13 |                   |                      | 8                                                                                                                                                                                                                 |
| 14 |                   |                      |                                                                                                                                                                                                                   |
| 15 |                   |                      |                                                                                                                                                                                                                   |
| 16 |                   |                      |                                                                                                                                                                                                                   |
| 17 |                   |                      |                                                                                                                                                                                                                   |
| 18 |                   |                      |                                                                                                                                                                                                                   |
| 19 | Descriptive data  | <a href="#">#14b</a> | Indicate number of participants with missing data for each variable of interest                                                                                                                                   |
| 20 |                   |                      |                                                                                                                                                                                                                   |
| 21 |                   |                      |                                                                                                                                                                                                                   |
| 22 |                   |                      |                                                                                                                                                                                                                   |
| 23 | NA                |                      |                                                                                                                                                                                                                   |
| 24 |                   |                      |                                                                                                                                                                                                                   |
| 25 | Descriptive data  | <a href="#">#14c</a> | Summarise follow-up time (eg, average and total amount)                                                                                                                                                           |
| 26 |                   |                      |                                                                                                                                                                                                                   |
| 27 |                   |                      |                                                                                                                                                                                                                   |
| 28 | 7                 |                      |                                                                                                                                                                                                                   |
| 29 |                   |                      |                                                                                                                                                                                                                   |
| 30 | Outcome data      | <a href="#">#15</a>  | Report numbers of outcome events or summary measures over time. Give information separately for exposed and unexposed groups if applicable.                                                                       |
| 31 |                   |                      |                                                                                                                                                                                                                   |
| 32 |                   |                      |                                                                                                                                                                                                                   |
| 33 |                   |                      |                                                                                                                                                                                                                   |
| 34 |                   |                      |                                                                                                                                                                                                                   |
| 35 | 8                 |                      |                                                                                                                                                                                                                   |
| 36 |                   |                      |                                                                                                                                                                                                                   |
| 37 |                   |                      |                                                                                                                                                                                                                   |
| 38 | Main results      | <a href="#">#16a</a> | Give unadjusted estimates and, if applicable, confounder-adjusted estimates and their precision (eg, 95% confidence interval). Make clear which confounders were adjusted for and why they were included          |
| 39 |                   |                      | 9                                                                                                                                                                                                                 |
| 40 |                   |                      |                                                                                                                                                                                                                   |
| 41 |                   |                      |                                                                                                                                                                                                                   |
| 42 |                   |                      |                                                                                                                                                                                                                   |
| 43 |                   |                      |                                                                                                                                                                                                                   |
| 44 | Main results      | <a href="#">#16b</a> | Report category boundaries when continuous variables were categorized                                                                                                                                             |
| 45 |                   |                      | 9                                                                                                                                                                                                                 |
| 46 |                   |                      |                                                                                                                                                                                                                   |
| 47 |                   |                      |                                                                                                                                                                                                                   |
| 48 | Main results      | <a href="#">#16c</a> | If relevant, consider translating estimates of relative risk into absolute risk for a meaningful time period                                                                                                      |
| 49 |                   |                      |                                                                                                                                                                                                                   |
| 50 |                   |                      |                                                                                                                                                                                                                   |
| 51 |                   |                      |                                                                                                                                                                                                                   |
| 52 | 9                 |                      |                                                                                                                                                                                                                   |
| 53 |                   |                      |                                                                                                                                                                                                                   |
| 54 | Other analyses    | <a href="#">#17</a>  | Report other analyses done—eg analyses of subgroups and interactions, and sensitivity analyses                                                                                                                    |
| 55 |                   |                      | 11                                                                                                                                                                                                                |
| 56 |                   |                      |                                                                                                                                                                                                                   |
| 57 |                   |                      |                                                                                                                                                                                                                   |
| 58 | <b>Discussion</b> |                      |                                                                                                                                                                                                                   |
| 59 |                   |                      |                                                                                                                                                                                                                   |
| 60 |                   |                      |                                                                                                                                                                                                                   |



|    |                    |                     |                                                                          |    |
|----|--------------------|---------------------|--------------------------------------------------------------------------|----|
| 1  | Key results        | <a href="#">#18</a> | Summarise key results with reference to study objectives                 | 12 |
| 2  |                    |                     |                                                                          |    |
| 3  | Limitations        | <a href="#">#19</a> | Discuss limitations of the study, taking into account sources of         | 13 |
| 4  |                    |                     | potential bias or imprecision. Discuss both direction and magnitude of   |    |
| 5  |                    |                     | any potential bias.                                                      |    |
| 6  |                    |                     |                                                                          |    |
| 7  |                    |                     |                                                                          |    |
| 8  | Interpretation     | <a href="#">#20</a> | Give a cautious overall interpretation considering objectives,           | 14 |
| 9  |                    |                     | limitations, multiplicity of analyses, results from similar studies, and |    |
| 10 |                    |                     | other relevant evidence.                                                 |    |
| 11 |                    |                     |                                                                          |    |
| 12 |                    |                     |                                                                          |    |
| 13 |                    |                     |                                                                          |    |
| 14 | Generalisability   | <a href="#">#21</a> | Discuss the generalisability (external validity) of the study results    | 14 |
| 15 |                    |                     |                                                                          |    |
| 16 | <b>Other</b>       |                     |                                                                          |    |
| 17 | <b>Information</b> |                     |                                                                          |    |
| 18 |                    |                     |                                                                          |    |
| 19 |                    |                     |                                                                          |    |
| 20 | Funding            | <a href="#">#22</a> | Give the source of funding and the role of the funders for the present   | 14 |
| 21 |                    |                     | study and, if applicable, for the original study on which the present    |    |
| 22 |                    |                     | article is based                                                         |    |
| 23 |                    |                     |                                                                          |    |
| 24 |                    |                     |                                                                          |    |

The STROBE checklist is distributed under the terms of the Creative Commons Attribution License CC-BY.

This checklist was completed on 27. June 2023 using <https://www.goodreports.org/>, a tool made by the

[EQUATOR Network](#) in collaboration with [Penelope.ai](#)

# BMJ Open

## Does Health & Her App Use Improve Menopausal Symptoms? A Longitudinal Cohort Study

|                                 |                                                                                                                                                                                                                                                                                                                |
|---------------------------------|----------------------------------------------------------------------------------------------------------------------------------------------------------------------------------------------------------------------------------------------------------------------------------------------------------------|
| Journal:                        | <i>BMJ Open</i>                                                                                                                                                                                                                                                                                                |
| Manuscript ID                   | bmjopen-2023-077185.R1                                                                                                                                                                                                                                                                                         |
| Article Type:                   | Original research                                                                                                                                                                                                                                                                                              |
| Date Submitted by the Author:   | 08-Nov-2023                                                                                                                                                                                                                                                                                                    |
| Complete List of Authors:       | Andrews, Robin; Cardiff University, Lancaster, Deborah; University of South Wales, Life Sciences & Education: School of Psychology<br>Bache, Kate; Health & Her<br>Lacey, Arron; Swansea University, 1Neurology and Molecular Neuroscience Group, Institute of Life Science, Swansea University Medical School |
| <b>Primary Subject Heading</b>: | Obstetrics and gynaecology                                                                                                                                                                                                                                                                                     |
| Secondary Subject Heading:      | Mental health, Patient-centred medicine, Pharmacology and therapeutics, Public health, Health informatics                                                                                                                                                                                                      |
| Keywords:                       | GYNAECOLOGY, Reproductive medicine < GYNAECOLOGY, Health informatics < BIOTECHNOLOGY & BIOINFORMATICS, Telemedicine < BIOTECHNOLOGY & BIOINFORMATICS, Quality of Life, MENTAL HEALTH                                                                                                                           |
|                                 |                                                                                                                                                                                                                                                                                                                |

SCHOLARONE™  
Manuscripts



I, the Submitting Author has the right to grant and does grant on behalf of all authors of the Work (as defined in the below author licence), an exclusive licence and/or a non-exclusive licence for contributions from authors who are: i) UK Crown employees; ii) where BMJ has agreed a CC-BY licence shall apply, and/or iii) in accordance with the terms applicable for US Federal Government officers or employees acting as part of their official duties; on a worldwide, perpetual, irrevocable, royalty-free basis to BMJ Publishing Group Ltd ("BMJ") its licensees and where the relevant Journal is co-owned by BMJ to the co-owners of the Journal, to publish the Work in this journal and any other BMJ products and to exploit all rights, as set out in our [licence](#).

The Submitting Author accepts and understands that any supply made under these terms is made by BMJ to the Submitting Author unless you are acting as an employee on behalf of your employer or a postgraduate student of an affiliated institution which is paying any applicable article publishing charge ("APC") for Open Access articles. Where the Submitting Author wishes to make the Work available on an Open Access basis (and intends to pay the relevant APC), the terms of reuse of such Open Access shall be governed by a Creative Commons licence – details of these licences and which [Creative Commons](#) licence will apply to this Work are set out in our licence referred to above.

Other than as permitted in any relevant BMJ Author's Self Archiving Policies, I confirm this Work has not been accepted for publication elsewhere, is not being considered for publication elsewhere and does not duplicate material already published. I confirm all authors consent to publication of this Work and authorise the granting of this licence.

# Does Health & Her App Use Improve Menopausal Symptoms? A Longitudinal Cohort Study

Andrews. R., Lancaster. D., Bache. K., Lacey. A.

**Corresponding author: Dr Robin Andrews (PhD), Cardiff University; Health & Her**

**Contact details & affiliations of authors:**

1. Dr Robin Andrews (PhD), [AndrewsR16@cardiff.ac.uk](mailto:AndrewsR16@cardiff.ac.uk), Cardiff University; Health & Her
2. Professor Deborah Lancaster (PhD), [Deborah.lancastle@southwales.ac.uk](mailto:Deborah.lancastle@southwales.ac.uk), University of South Wales
3. Kate Bache (MChem), [kate@healthandher.com](mailto:kate@healthandher.com), Health & Her
4. Dr Arron Lacey (PhD), [a.s.lacey@swansea.ac.uk](mailto:a.s.lacey@swansea.ac.uk), Swansea University

**Key words:**

- Menopause
- m-health
- Women's health
- Menopausal symptoms
- Symptom monitoring
- Menstrual tracking

**Word count: 3959**

## **Abstract**

**Objectives:** The Health & Her app provides menopausal women with a means of monitoring their symptoms, symptom triggers, and menstrual periods, and enables them to engage in a variety of digital activities designed to promote wellbeing. The aim of this study was to examine whether sustained weekly engagement with the app is associated with improvements in menopausal symptoms.

**Design:** A pre-post longitudinal cohort study.

**Setting:** Analysed data collected from Health & Her app users.

**Participants:** 1,900 women who provided symptom data via the app across a 2-month period.

**Primary and Secondary outcome measures:** Symptom changes from baseline to 2 months was the outcome measure. A linear mixed effects model explored whether levels of weekly app engagement influenced symptom changes. Secondary analyses explored whether app-usage factors such as total number of days spent logging symptoms, reporting triggers, reporting menstrual periods, and using in-app activities were independently predictive of symptom changes from baseline. Covariates included HRT (Hormone Replacement Therapy) use, hormonal contraceptive use, present comorbidities, age, and dietary supplement use.

**Results:** Findings demonstrated that greater engagement with the Health & Her app for 2-months was associated with greater reductions in symptoms over time. Daily use of in-app activities and logging symptoms and menstrual periods were each independently associated with symptom reductions.

**Conclusions:** This study demonstrated that greater weekly engagement with the app was associated with greater reductions in symptoms. It is recommended that women be made aware of menopause-specific apps, such as that provided by Health & Her, to support them to manage their symptoms.

## **Article Summary**

### **Strengths and Limitations of this study:**

- Outcome measures (i.e., symptom changes) were self-reported.
- This study was not randomised.
- This study controlled for multiple factors known to influence symptoms during menopause.
- This study included a large sample of perimenopausal and menopausal women (N=1900).

## **Introduction**

Menopause is a naturally occurring reproductive phase in which women permanently cease to menstruate. Menopause is associated with a number of symptoms, which in some women, can heavily impact health and quality of life (1). The main treatment for menopausal symptoms is Hormone Replacement Therapy (HRT). Despite menopause encompassing a wide variety of symptom domains, including psychological issues, HRT is currently only indicated for alleviating vasomotor and genitourinary symptoms (2). Thus, there is a need to identify alternative interventions to HRT which could support women to manage their health during menopause.

Use of freely available mobile health (m-health) apps have been associated with improved health outcomes. Zhaunova et al. (3) found that an app which enabled women to monitor their menstrual periods was associated with improvements in physical and psychological symptoms. A study by McCloud et al. (4) demonstrated that an app which provided digital Cognitive Behavioural Therapy (CBT) activities and mood monitoring was associated with improvements in anxiety and depression symptoms.

Studies in women experiencing menopausal symptoms suggest that symptom monitoring can improve symptoms, reduce negative emotions, and could heighten health awareness, helping women avoid behaviours which could negatively impact their health (5)(6). Therefore, digital apps which support symptom monitoring, as well as providing women with menstrual tracking and therapeutic activities, may be useful for improving symptoms during menopause.

Furthermore, among women who choose to use HRT or other interventions for their menopausal symptoms, such as dietary supplements or exercise therapies, adjunct digital tools may be beneficial for helping them track the impact and efficacy of these treatments.

### ***Aims & Research Questions:***

A recent systematic review found evidence that, of the 28 UK menopause apps reviewed, none of these apps had been evaluated via peer-reviewed research (7). To identify any potential health implications, m-health apps need to be scientifically evaluated in terms of harms and benefits to health. Therefore, our key objective is to examine whether use of the Health & Her iOS and Android mobile phone app is associated with symptom changes. The Health & Her app enables women to track their menopausal symptoms, symptom triggers, and menstrual periods. The app also provides users with a range of activities which can help them manage their menopausal symptoms including CBT, pelvic floor, and meditation exercises. The app also signposts users to health and lifestyle articles written by experts such as general practitioners and psychologists, as well as products which are designed to support wellness, including own-brand Health & Her dietary supplements, and dietary supplements of external brands.

We present a longitudinal pre-post cohort study of symptom changes using the Health & Her app. The primary aim of this study was to explore whether use of the Health & Her app was associated with changes in symptoms over 2-months. Our secondary aim was to explore whether increased app engagement was associated with greater changes in menopausal symptoms. Therefore, participants were grouped and compared according to the number of separate weeks they had engaged with the Health & Her app. Within these groups we observed whether the changes in symptom scores reported by women were statistically significant, by comparing symptom reports at the point of first app use with consecutive symptom reports provided throughout 2 months of app use. The Health & Her app also collects data on medical history, medications and dietary supplements used, and lifestyle

factors (i.e. symptom triggers such as alcohol consumption, smoking etc.), enabling us to control for a number of factors in our analysis. Therefore, we addressed the following research questions:

1. After controlling for covariates, is the Health & Her app associated with symptom changes across a 2-month period?
2. Does level of engagement with the Health & Her app influence symptom changes?

## **Methods**

### ***Study Context & Design***

This analysis encompasses a longitudinal pre-post assessment of Health & Her app data collected between October 2020 and January 2023. This study examined the effect of app engagement on symptom changes across 2-months of app use. This study included women who had reported their symptoms before and after 2 months of Health & Her app use. To examine the impact of app engagement, participants were grouped according to the number of separate weeks they had engaged with the app; engagement was defined as using the app to log a symptom, menstrual period, trigger, or to complete an in-app activity. Levels of engagement ranged from 2 separate weeks (they engaged with the app within the first and last week of the 2-month period only) to 9 separate weeks (they engaged with the app within every week of the 2-month period). Thus, this study encompassed 8 distinct app engagement groups: 2 weeks, 3 weeks, 4 weeks, 5 weeks, 6 weeks, 7 weeks, 8 weeks, and 9 weeks. The repeated measures variable was symptom score, which was calculated for each day participants logged their symptoms. The dependent variable was symptom change scores, which was calculated by subtracting each consecutive symptom score from the baseline symptom score, until the final one provided by all participants at 2-months. As participants varied in the number of days they logged their symptoms via the app, the present study used an unbalanced design. For example, some participants may have provided 62 symptom scores (i.e., they had logged every day of the 2-month period), whereas others may have 2 symptom scores (i.e., they had logged symptoms at the beginning and end of the 2-month period only). To account for this imbalance, the main analysis involved a linear mixed effects model.

### ***Participants***

**Inclusion:** This study included anonymised data from women who downloaded the Health & Her app, had consented to their data being used for research purposes, and had reported their symptoms both pre and post 2 months of app use. Applying this inclusion criteria to over 150,000 women who had downloaded the app and had answered all prerequisite questions to access the app's facilities, we arrived at a final sample of 1,900 women, who collectively provided a total of 31,076 distinct symptom observations. Women were made aware of the app through social media adverts, the Health & Her website, word of mouth, the IOS app store (), Google Play Store ([https://play.google.com/store/apps/details?id=com.healthandher&hl=en\\_GB&gl=US](https://play.google.com/store/apps/details?id=com.healthandher&hl=en_GB&gl=US)), or through seeing app advertisements on Health & Her brand supplements bought in store or online through a retailer or directly from the Health & Her website. Health & Her advertisements are designed to focus on women of perimenopausal and menopausal age, who have indicated an online interest in menopause, and who live in the United Kingdom. The

1  
2  
3 app is freely available on IOS and android via the app store or Google play store. All data  
4 were fully anonymised prior to analysis. Participants were linked using individual  
5 identification codes, these codes are routinely created for all Health & Her app users via  
6 Amazon Web Services.  
7

8  
9 Ethics: All participants provided consent for their data to be used for research purposes. The  
10 present study was approved by the University of South Wales ethical review board under  
11 reference number: 23RA03LR.  
12

13 Patient & Public Involvement: Patients and the public were not involved in the design or  
14 development of research questions. However, because the app is freely available to anyone  
15 with a smartphone, the public, and likely patients who have accessed health services for  
16 issues relating to menopause, have been included as participants.  
17  
18

### 19 ***Data Collection***

20  
21 The Health & Her app: After first downloading and opening the app, users are asked to  
22 engage with an onboarding process which asks users to provide information on their age,  
23 medical history, HRT use, hormonal contraceptive use, menopausal status, dietary  
24 supplement usage and current menopausal symptoms. Once all onboarding questions have  
25 been answered users are given the opportunity to begin tracking their menopausal symptoms,  
26 as well as their symptom triggers and menstrual cycles if they are still experiencing periods.  
27 Users are also given the opportunity to create a plan by setting daily goals using digital in-app  
28 activities designed to improve menopausal symptoms and heighten psychological wellbeing.  
29 Activities include CBT exercises (CBT for loss of sex drive, CBT for low mood, CBT for hot  
30 flushes), a guided sleep meditation exercise, a paced-breathing exercise, stress & anxiety  
31 meditation exercise, a pelvic floor exercise timer, drink water reminders, and HRT and  
32 supplement reminders. Triggers include lifestyle and situational factors which could increase  
33 or worsen symptoms, such as stress at work, alcohol consumption, and smoking. The app also  
34 provides women with articles to help them learn more about menopause, and strategies they  
35 can undertake to help them manage their symptoms. Women are encouraged to return to the  
36 app to track their symptoms, periods, and symptom triggers, or complete digital activities  
37 through scheduled push notifications (if the user has enabled notifications on their mobile  
38 device).  
39  
40  
41  
42

43 Symptom Scores: Health & Her app users are invited to report their menopausal symptoms  
44 and concurrent symptom severities using a list of 22 common menopausal symptoms.  
45 Symptom severities range from 1 (mild), 2 (moderate), to 3 (severe). Figure 1 shows  
46 menopausal symptoms and their frequency distributions in the cohort. Using the methods  
47 employed in previous research using the Daily Record Keeping form (8)(6) symptom scores  
48 were calculated for each instance the user logged their symptoms by multiplying total number  
49 of symptoms with their average symptom severity e.g., Hot Flashes (severity=1), Sleeping  
50 Problems (severity=2), Night Sweats (severity=3) would result in a total symptom score of  
51 =6. A continuous symptom difference score was calculated to observe how symptoms  
52 increased or decreased throughout the 2-month app usage period. Therefore, a symptom score  
53 was calculated for each instance users input their symptoms into the app, and symptom  
54 change scores were calculated by subtracting each consecutive symptom score from the  
55 baseline symptom score, up until endpoint at 2-months.  
56  
57  
58  
59  
60



**Engagement:** App engagement was quantified by counting the number of distinct weeks users engaged with the app (*Weeks Engaged*) to log symptoms, triggers, periods, or complete in-app activities within the 2-month span. Factors relating to app usage were assessed to evaluate and control for their independent effects, including daily use of symptom logging, trigger logging, reporting menstrual periods, and use of activities featured within the app. The total number of days women logged their symptoms, logged symptom triggers, logged periods, or completed in-app activities across the 2-month period were examined as continuous variables.

**Covariates:** Covariates were included to control for their effects on symptom improvement and heighten statistical accuracy, reduce bias, and enable a more accurate representation of the effects of app engagement.

The following covariates were added as dichotomous Yes/No variables: HRT usage, hormonal contraceptive usage, current self-reported medical conditions (e.g., PCOS, fibroids, endometriosis, PMS/PMDD, pre/postnatal depression, gestational diabetes, depression, anxiety, cancer, adenomyosis, autoimmune diseases, premature ovarian failure). Age was added as a continuous variable. As the Health & Her app is advertised alongside the Health & Her brand supplements, it was important to evaluate variances in outcomes among women who used Health & Her supplements. Therefore, supplement use was compared as a factor with 4 levels, Not using any Supplements, External Supplements (i.e., using a brand other than Health & Her's), using Health & Her brand supplements only, and using both Health & Her and External Supplements. It was important to control for the effects of using Health & Her brand supplements in order to account for placebo or expectation effects among Health & Her supplement customers.

To control for individual variations in symptom reporting, baseline symptom scores were added as covariates. However, to evaluate the independent effect of specific symptom types reported at baseline, baseline symptom scores were split according to Physical symptoms at baseline= *Headaches, Digestive Issues, Bloating, Dizziness, Skin Changes, Joint Aches, Period Changes, Palpitations, Weight Gain*; Psychological symptoms at baseline= *Low Mood, Stress & Anxiety, Low Energy, Brain Fog, Memory Loss, Poor Concentration*; Urogenital symptoms at baseline= *Sensitive Bladder, Vaginal Dryness, Painful Sex, Loss of Sex Drive*; and Vasomotor symptoms at baseline= *Hot Flushes, Night Sweats, Sleeping Problems*.

### **Data Analysis**

No data were missing from the final sample. The anonymised data was directly obtained by the lead author from Health & Her's databank, hosted on Amazon Web Services (AWS; available at: <https://aws.amazon.com>). Statistical analyses were computed via R Studio version 4.02 (9). The main analysis involved a linear mixed effects model, which was computed using R package 'lme4' (10). To control for individual variances, participant ID was added as a random effect. A forest plot was developed using R package SjPlot (11) to visually assess the direction of the effects of all predictor variables. Using R package 'emmeans' (12), a pairwise comparison plot was computed, which visually depicted symptom changes at the beginning and end of the 2-month period for each weekly engagement group, whilst controlling for the effects of covariates. As it is not recommended to compare CIs side by side in mixed methods designs, comparison arrows were computed to visualise significant within-group differences (12). Frequency counts (N, %) were computed to assess the distribution of menopausal status, menopausal symptoms, app usage variables,

1  
2  
3 current comorbidities, and medication use across the present sample. Differences between  
4 weekly app engagement groups in terms of sample characteristics were established via  
5 Kruskal-Wallis rank sum tests (for Age, Days Engaged in Symptom logging/ Trigger  
6 logging/ Period logging/ use of in-app Activities and Baseline/ Follow-up Symptom Score)  
7 and Pearson's Chi-squared tests (for HRT use, Supplement use, and Contraceptive use, and  
8 Current Comorbidities) using R package gtSummary (13). Benjamini & Hochberg p-value  
9 corrections were applied to control for the effects of multiple comparisons.  
10  
11

### 12 *Power:*

13  
14  
15 Using R package 'simr' (14) a power analysis was calculated to assess the extent to which the  
16 present sample size could accurately detect true significant effects of weekly engagement.  
17 This analysis demonstrated that our study had 99.80% (95% CI [99.42, 99.96]) power in  
18 detecting the true effects of weekly app engagement.  
19  
20

## 21 **Results**

### 22 **Sample Characteristics**

23  
24  
25 The mean age of participants was 48 (SD=4.7). Most participants were perimenopausal  
26 (n=1402, 74%), 16% (n=298) of participants were unsure of their menopausal status due to  
27 using HRT or hormonal contraceptives, 9% (n=181) were menopausal, and a small number  
28 were postmenopausal (n=19, <1%). Approximately half reported medical comorbidities  
29 (53%) and 53% were not currently using dietary supplements. The average time between first  
30 and final symptom log was 60.35 (SD=1.96) days. As shown in Figure 1, the most common  
31 menopausal symptoms were Low Energy (65%), Low Mood (59%), Sleeping Problems  
32 (58%), Stress & Anxiety (58%), whereas least common symptoms included Painful Sex  
33 (16%) and Vaginal Dryness (28%).  
34  
35  
36

37 Figure 1: Menopausal symptom distributions across the full sample:

38 INSERT FIGURE 1 HERE  
39  
40  
41  
42

43 **Between Group Variances:** Supplementary Table S1 shows the differences in scores  
44 between the app engagement groups for the present sample. Participants varied between  
45 groups in terms of age: women who engaged with the app for 2 or 3 weeks tended to be older  
46 than women who engaged for 4 weeks or more ( $p < .001$ ). The groups also differed in app  
47 usage. Frequency of days women logged Symptoms, Periods, Activities, and Triggers  
48 increased according to the number of Weeks Engaged ( $p < .001$ ). Final symptom scores were  
49 statistically lower as Weeks Engaged increased ( $p < .001$ ). Upon adjustment of multiple  
50 comparison testing, participants did not vary in terms of other sample characteristics.  
51  
52  
53  
54  
55  
56  
57  
58  
59  
60

**Linear Mixed Effects Model:** Table 1 shows the summary statistics from the linear mixed effects model which examined the effects of Weeks Engaged, app-usage variables, and covariates on symptom changes across the 2-month period.

Table 1: Linear Mixed Effects Model of Predictors of Symptom Change Scores:

| Characteristic                 | $\beta$      | 95% CI <sup>1</sup> |
|--------------------------------|--------------|---------------------|
| <b>Urogenital Symptoms</b>     | <b>-0.46</b> | <b>-0.61, -0.32</b> |
| <b>Vasomotor Symptoms</b>      | <b>-0.45</b> | <b>-0.58, -0.32</b> |
| <b>Psychological Symptoms</b>  | <b>-0.54</b> | <b>-0.62, -0.46</b> |
| <b>Physical Symptoms</b>       | <b>-0.42</b> | <b>-0.50, -0.34</b> |
| <b>Age</b>                     | 0.00         | -0.06, 0.06         |
| <b>HRT</b>                     | -0.24        | -1.1, 0.62          |
| <b>Supplements</b>             |              |                     |
| None                           | —            | —                   |
| Both                           | -0.54        | -1.6, 0.55          |
| External Only                  | 0.39         | -0.24, 1.0          |
| Health & Her Only              | <b>-1.3</b>  | <b>-2.2, -0.35</b>  |
| <b>Hormonal Contraceptives</b> | -0.01        | -0.73, 0.72         |
| <b>Current Comorbidities</b>   | <b>0.94</b>  | <b>0.38, 1.5</b>    |
| <b>Trigger Logs</b>            | <b>0.05</b>  | <b>0.02, 0.08</b>   |
| <b>Activity Logs</b>           | <b>-0.03</b> | <b>-0.06, -0.01</b> |
| <b>Period Logs</b>             | <b>-0.12</b> | <b>-0.21, -0.03</b> |
| <b>Symptom Logs</b>            | <b>-0.06</b> | <b>-0.10, -0.01</b> |
| <b>Weeks Engaged</b>           |              |                     |
| 2                              | —            | —                   |
| 3                              | <b>-1.2</b>  | <b>-2.2, -0.26</b>  |
| 4                              | <b>-2.7</b>  | <b>-3.8, -1.6</b>   |
| 5                              | <b>-2.6</b>  | <b>-3.7, -1.5</b>   |
| 6                              | <b>-3.3</b>  | <b>-4.5, -2.0</b>   |
| 7                              | <b>-3.2</b>  | <b>-4.5, -1.8</b>   |
| 8                              | <b>-3.8</b>  | <b>-5.2, -2.3</b>   |
| 9                              | <b>-4.0</b>  | <b>-5.8, -2.3</b>   |

<sup>1</sup> CI = Confidence Interval

These findings indicate that increasing Weeks Engaged is statistically significantly associated with lower symptom total: at 3 weeks,  $\beta=-1.2$ , 95% CI [-2.2, -0.26], 4 weeks  $\beta=-2.7$  [-3.8, -1.6], 5 weeks  $\beta=-2.6$  [-3.7, -1.5], 6 weeks  $\beta=-3.3$  [-4.5, -2.0], 7 weeks  $\beta=-3.2$  [-4.5, -1.8], 8 weeks  $\beta=-3.8$  [-5.2, -2.3] and 9 weeks  $\beta=-4.0$  [-5.8, -2.3]. Beta statistics indicate that app engagement predicted greater reductions in symptoms as the number of Weeks Engaged increased. Reporting a current comorbidity  $\beta= 0.94$  [0.38, 1.5] and Trigger logging were predictive of increased symptom scores  $\beta= 0.05$  [0.02, 0.08] whereas Symptom logging  $\beta= -0.06$  [-0.10, -0.01], Period logging  $\beta= -0.12$  [-0.21, -0.03], and completing in-app Activities were related to reduced symptoms  $\beta= -0.03$  [-0.06, -0.01]. Taking a Health & Her brand supplement was also related to reduced symptoms  $\beta= -1.3$  [-2.2, -0.35].

1  
2  
3 Out of the four symptom domains, reporting Psychological Symptoms at baseline was  
4 associated with the greatest symptom reductions  $\beta = -0.54$  [-0.62, -0.46], whereas Physical  
5 symptoms at baseline were associated with the smallest effect on symptom reductions  $\beta = -$   
6 0.42 [-0.5, -0.34].  
7

8 Figure 2 shows the point estimates of the effects of predictors on symptom change scores  
9 from baseline. Confidence intervals are wide within the weekly engagement groups,  
10 suggesting high variability in symptom scores. The forest plot demonstrates the linear  
11 association between Weeks Engaged and reduced symptoms.  
12

13  
14 Figure 2: Correlation Forest Plot Depicting Effects of all Model Predictors on Symptom  
15 Changes:  
16

17 **INSERT FIGURE 2 HERE**  
18  
19  
20  
21

22 **Pairwise comparisons:** Figure 3 demonstrates the differences in symptoms before and after  
23 2-months of app use according to number of weeks women engaged with the app. Within  
24 each of the engagement groups there were statistically significant reductions in symptoms  
25 after 2-months, indicated by the lack of overlap between the red comparison arrows. As total  
26 number of engagement weeks increased, reductions in symptoms after 2-months of app use  
27 became larger.  
28  
29  
30  
31  
32  
33  
34  
35  
36  
37  
38  
39  
40  
41  
42  
43  
44  
45  
46  
47  
48  
49  
50  
51  
52  
53  
54  
55  
56  
57  
58  
59  
60

1  
2  
3  
4  
5  
6  
7  
8  
9  
10  
11  
12  
13  
14  
15  
16  
17  
18  
19  
20  
21  
22  
23  
24  
25  
26  
27  
28  
29  
30  
31  
32  
33  
34  
35  
36  
37  
38  
39  
40  
41  
42  
43  
44  
45  
46

Figure 3: Pairwise Comparisons of Pre/Post Variances in Symptom Scores by Number of Weeks Engaged:

INSERT FIGURE 3 HERE.

For peer review only

## **Discussion**

These findings demonstrate that use of the Health & Her app for 2-months was associated with reduced menopausal symptoms. Moreover, women who engaged with the app more frequently across the 2-month period reported greater reductions in symptoms than women who engaged for fewer weeks. These findings remained significant after controlling for covariates such as HRT use, hormonal contraceptive use, supplement use, age, and current comorbidities.

Although symptoms significantly decreased regardless of the number of weeks women engaged with the app, the more women engaged with the app the greater their reductions in symptoms. Notably, women who engaged more with the app reported more use of the app's features, suggesting that improvements could be attributed to greater combined utilisation of the app's facilities such as logging periods, triggers, in-app activities, and monitoring symptoms. The total number of days spent monitoring symptoms independently predicted symptom reductions. This is in-line with prior research which has demonstrated that symptom monitoring can result in reductions in menopausal symptoms (5,6). However, combined weekly engagement with the app was associated with greater reductions in symptoms than symptom monitoring alone, suggesting that using multiple facets of the Health & Her app can bestow greater benefits to the user.

Logging symptom triggers via the app was associated with increased symptoms. This was an expected outcome, given that symptom triggers act as a measure of experiences and behaviour. For example, triggers include alcohol, stress at work, and smoking, and these factors can all negatively influence symptoms (15). However, given that trigger reporting increased as app engagement increased, it is likely that combining trigger logging with the other facets of the app (logging symptoms, logging periods, using in-app activities etc.) contributed to improvements over time because women noted the links between their symptom triggers and symptom outcomes.

As with prior research (4), completion of in-app activities was significantly associated with reduced symptoms. It is possible that use of activities had a larger impact on symptoms than shown in the present study, as women may have completed activities through notification prompts (e.g. drink water reminders, pelvic floor exercises), foregoing the need to access the app to complete and record their activity completion. This would explain why low engagers reported statistically significant reductions in symptoms after 2-months.

Logging periods was also associated with symptom reductions, which supports Zhaunova et al's (3) findings. This could suggest that women in the early stage of perimenopause, and therefore still experiencing regular periods, might experience greater benefits from the app than postmenopausal women. Furthermore, women who engaged less with the app were older than more frequent users.

Of the four symptom domains evaluated, reporting psychological symptoms at baseline was associated with the greatest reductions in symptom scores. This outcome is supported by Andrews et al's (6) randomised trial, which demonstrated that daily symptom monitoring was associated with reductions in anxiety, brain fog, low energy, and poor concentration, all of which were assessed as psychological symptoms in the present study.

The most frequent symptoms among this sample included low energy, low mood, and stress and anxiety. These symptoms are highly prevalent symptoms of perimenopause and menopause (2), and evidence suggests that individuals living with psychological symptoms are highly drawn to self-help methods such as apps to find solutions to their distress (16).

1  
2  
3 Furthermore, as HRT is not indicated for improving psychological symptoms, this finding  
4 may provide support for using the Health & Her app as an adjunct to HRT (2).

5 A notable outcome was that Health & Her brand supplement use was associated with  
6 symptom reductions. The improvements may have been related to the beneficial impact of  
7 taking the supplements. Vitamin D supplementation, a key ingredient of Health & Her's  
8 supplements, has been demonstrated among menopausal women (17). Alternatively, this  
9 outcome may be related to placebo effects, as individuals who had recently started taking  
10 Health & Her supplements may have had a positive expectation that the supplement will lead  
11 to better health outcomes, and these expectations may have manifested as self-reported health  
12 improvements (18).  
13  
14  
15  
16

### 17 **Strengths, Limitations & Future Directions:**

18  
19 A key strength of this study was that it utilised a large participant sample (N=1,900) of  
20 women with menopausal symptoms, improving the external validity of these findings. The  
21 present study showed clear evidence that increased engagement in the Health & Her app was  
22 associated with improved symptoms, as established by analyses which controlled for multiple  
23 factors known to influence symptoms during menopause, and random variances within  
24 individual app users. The outcome measure of self-reported symptoms is another strength  
25 because it is easy to obtain, inexpensive, and easily analysed through observation. However,  
26 there are limitations with collecting information through self-report. Subjective reports of  
27 menopausal symptoms have been known to vary from objective measures (19). In particular,  
28 subjective measures of hot flushes have been found to be more susceptible to placebo effects  
29 (20).  
30  
31

32 Moreover, this study is vulnerable to sampling bias, as to be eligible for inclusion participants  
33 were required to have access to a smartphone device in order to engage with the app.

34 However, given that 80% of women in the UK own a smartphone, this is unlikely to have a  
35 large impact on the generalisability of this data(21).  
36

37 Another limitation was the observational design, which restricted the data to that which  
38 participants chose to input into the app. Therefore this study is at risk of confounding from  
39 unmeasured factors as it was also not possible to determine whether participants had any  
40 characteristics that were not captured by the app i.e., impact of notifications which remind  
41 users to engage in positive health behaviours, reading in-app health articles, recent medical  
42 help seeking, use of medications not listed by the app, comorbidities not listed by the app, or  
43 ethnicity and other demographic variables. Furthermore, users with fewer or less severe  
44 symptoms may not have continued engaging with the app for the two-month period as they  
45 may have decided that their symptoms were not worrying and were therefore not motivated to  
46 continue observing them. Therefore, a key future direction would be to conduct a controlled  
47 study assessing app use with clear parameters in terms of adherence to app usage, and  
48 characteristics such as age, menopausal symptoms, and menopausal status.  
49

50 It would also be useful to observe a longer-term study of app engagement, comparing  
51 participants with predominantly physical and psychological symptoms, with a post survey of  
52 app users who stopped engaging with the app to give a clearer, more sustained estimate of the  
53 effect. This will enable us to identify predictors of engagement with the Health & Her app.  
54 However, given that statistical differences were found in the present study, in the directions  
55 expected, this suggests that the benefits of using the Health & Her app to manage symptoms  
56 during the menopause transition are robust.  
57

58 Additionally, because the present sample predominantly reported psychological symptoms,  
59 and these types of symptoms were associated with larger improvements than the other  
60

1  
2  
3 symptom domains (e.g., physical, urogenital and sexual, vasomotor and sleep), this might  
4 suggest that app usage is most effective for women with these symptom characteristics.  
5 Moreover, these results may suggest that those with psychological symptoms are more likely  
6 to seek out apps than those who are less impacted by such symptoms, and these women may  
7 benefit more from app use. Therefore, future research should further investigate the impact of  
8 Health & Her app usage on women reporting specific symptom types to evaluate these  
9 outcomes.

10  
11 The improvements in psychological symptoms could be related to the Health & Her app  
12 providing women with several activities designed to alleviate stress and psychological  
13 symptoms (i.e., digital CBT exercise for low mood, deep breathing exercises, and a stress and  
14 anxiety mediation exercise), as well as content designed to empower women during  
15 menopause. Notably, research examining therapeutic exercises such as paced respiration (22)  
16 and meditation (23) outside of app modalities have demonstrated positive effects on  
17 menopausal symptoms. While out of scope for the present study, subsequent research  
18 assessing the Health & Her app will aim to examine the impact of individual activities on  
19 symptom reductions.

20  
21 Health & Her supplement usage was associated with reductions in symptoms. This may  
22 suggest that app usage enhanced the effects of taking supplements, or vice versa, as women  
23 tracked their symptom changes and recognised the improvements which in turn further  
24 encouraged them to engage with the app. However, without conducting a randomised  
25 controlled trial, it is not possible to rule out the potential for a placebo effect. Thus, further  
26 research is needed to establish the impact of using the app as an adjunct to menopause-  
27 specific treatments.

## 30 **Conclusions:**

31  
32  
33 This study demonstrated that use of Health & Her's app for a 2-month period was associated  
34 with symptom reductions among 1,900 app users. Given the large sample size, this suggests  
35 these findings are generalisable to menopausal women. Moreover, greater weekly  
36 engagement with the app was associated with greater reductions in symptoms. These results  
37 support previous findings which have suggested that symptom monitoring and use of digital  
38 tools which facilitate period logging, and health-promoting digital activities can be beneficial  
39 for improving health outcomes, especially relating to psychological complaints (5,6,3,4).  
40 However, these findings are limited by the observational study design. Therefore, future  
41 research should conduct a fully controlled study to further understand the effects of using the  
42 Health & Her app to improve health during menopause, with a focus on exploring the app as  
43 an adjunct to menopause-specific treatments.

44  
45 This study contributes to evidence that suggests monitoring and appraising symptoms can  
46 result in increased engagement in women who likely want to reduce their menopausal  
47 symptom prevalence and severity. In light of these findings, it is recommended that women  
48 be made aware of the benefits of using digital health apps by health providers treating women  
49 in need of support for menopausal symptoms, to help them manage their menopausal  
50 symptoms and track the impact of treatments.

51  
52  
53  
54 **Acknowledgements:** We the authors would like to thank Dr Rebecca Tomlinson for  
55 providing her insights on this research using her perspective as a General Practitioner and  
56 menopause specialist.

57  
58  
59 **Funding:** This study was funded by Health & Her.



**Competing interests:** RA is employed by Health & Her. KB is the CEO and co-founder of Health & Her. AL is employed by Health & Her on a contractual basis. DL has received honoraria and expenses from Gedeon Richter: Preglem for expert speaker and web contributions.

**Author contributions:** RA was responsible for conceptualising the study, analysing the data, and preparing the manuscript. DL was responsible for reviewing the manuscript and consulting on the design and analyses. KB was responsible for conceptualising the study and reviewing the manuscript. AL consulted on the study design and data analyses and reviewed the manuscript.

**Data Access:** The data used in the present study is not to be made publicly available and is the intellectual property of Health & Her.

**Ethics:** All participants provided consent for their data to be used for research purposes. The present study was approved by the University of South Wales ethical review board under reference number: 23RA03LR.

## References

1. Mishra GD, Kuh D. Health symptoms during midlife in relation to menopausal transition: British prospective cohort study. *BMJ* [Internet]. 2012 Feb 8 [cited 2022 Sep 15];344:e402. Available from: <https://www.bmj.com/content/344/bmj.e402>
2. Overview | Menopause: diagnosis and management | Guidance | NICE [Internet]. NICE; [cited 2022 Oct 7]. Available from: <https://www.nice.org.uk/guidance/ng23>
3. Zhaunova L, Bamford R, Radovic T, Wickham A, Peven K, Croft J, et al. Characterisation of self-reported improvements in education and health among users of Flo period tracking app: cross-sectional survey [Internet]. *OSF Preprints*; 2022 [cited 2022 Nov 22]. Available from: <https://osf.io/vhn6x/>
4. McCloud T, Jones R, Lewis G, Bell V, Tsakanikos E. Effectiveness of a Mobile App Intervention for Anxiety and Depression Symptoms in University Students: Randomized Controlled Trial. *JMIR MHealth UHealth* [Internet]. 2020 Jul 31 [cited 2022 Nov 22];8(7):e15418. Available from: <https://mhealth.jmir.org/2020/7/e15418>
5. Andrews R, Hale G, John B, Lancaster D. Evaluating the Effects of Symptom Monitoring on Menopausal Health Outcomes: A Systematic Review and Meta-Analysis. *Front Glob Womens Health*. 2021;2.
6. Andrews RAF, John B, Lancaster D. Symptom monitoring improves physical and emotional outcomes during menopause: a randomized controlled trial. *Menopause* [Internet]. 2023 Mar [cited 2023 Feb 27];30(3):267. Available from: <https://journals.lww.com/menopausejournal/pages/articleviewer.aspx?year=2023&issue=03000&article=00007&type=Fulltext>
7. Paripoorani D, Gasteiger N, Hawley-Hague H, Dowding D. A systematic review of menopause apps with an emphasis on osteoporosis. *BMC Womens Health*. 2023;23(1):518.

- 1
  - 2
  - 3
  - 4
  - 5
  - 6
  - 7
  - 8
  - 9
  - 10
  - 11
  - 12
  - 13
  - 14
  - 15
  - 16
  - 17
  - 18
  - 19
  - 20
  - 21
  - 22
  - 23
  - 24
  - 25
  - 26
  - 27
  - 28
  - 29
  - 30
  - 31
  - 32
  - 33
  - 34
  - 35
  - 36
  - 37
  - 38
  - 39
  - 40
  - 41
  - 42
  - 43
  - 44
  - 45
  - 46
  - 47
  - 48
  - 49
  - 50
  - 51
  - 52
  - 53
  - 54
  - 55
  - 56
  - 57
  - 58
  - 59
  - 60
8. Boivin J, Takefman JE. Stress level across stages of in vitro fertilization in subsequently pregnant and nonpregnant women. *Fertil Steril*. 1995 Oct;64(4):802–10.
9. Team Rs. RStudio: integrated development for R. RStudio, PBC, Boston, MA. 2020. 2021.
10. Bates D, Maechler M, Bolker B, Walker S. Fitting linear mixed-effects models using lme4. *Journal of Statistical Software* 67: 1–48. 2015;
11. Lüdtke D, Bartel A, Schwemmer C, Powell C, Djalovski A, Titz J. sjPlot: Data Visualization for Statistics in Social Science [Internet]. 2022 [cited 2022 Oct 24]. Available from: <https://CRAN.R-project.org/package=sjPlot>
12. Lenth R, Singmann H, Love J, Buerkner P, Herve M. Emmeans: Estimated marginal means, aka least-squares means. *R Package Version*. 2018;1(1):3.
13. Sjoberg DD, Curry M, Hannum M, Whiting K, Zabor EC. gtsummary: Presentation-ready data summary and analytic result tables. *Publ Online*. 2020;
14. Green P, MacLeod CJ. SIMR: an R package for power analysis of generalized linear mixed models by simulation. *Methods Ecol Evol*. 2016;7(4):493–8.
15. Noll PR e S, Noll M, Zangirolami-Raimundo J, Baracat EC, Louzada ML da C, Soares Júnior JM, et al. Life habits of postmenopausal women: Association of menopause symptom intensity and food consumption by degree of food processing. *Maturitas* [Internet]. 2022 Feb 1 [cited 2023 Feb 27];156:1–11. Available from: <https://www.sciencedirect.com/science/article/pii/S0378512221003078>
16. Kaveladze BT, Wasil AR, Bunyi JB, Ramirez V, Schueller SM. User Experience, Engagement, and Popularity in Mental Health Apps: Secondary Analysis of App Analytics and Expert App Reviews. *JMIR Hum Factors* [Internet]. 2022 Jan 31 [cited 2023 Nov 2];9(1):e30766. Available from: <https://www.ncbi.nlm.nih.gov/pmc/articles/PMC8844980/>
17. Pérez-López FR, Chedraui P, Pilz S. Vitamin D supplementation after the menopause. *Ther Adv Endocrinol Metab*. 2020;11:2042018820931291.
18. Paranjpe MD, Chin AC, Paranjpe I, Reid NJ, Duy PQ, Wang JK, et al. Self-reported health without clinically measurable benefits among adult users of multivitamin and multimineral supplements: a cross-sectional study. *BMJ Open*. 2020;10(11):e039119.
19. Pan Y, Meister R, Löwe B, Kaptchuk TJ, Buhling KJ, Nestoriuc Y. Open-label placebos for menopausal hot flashes: a randomized controlled trial. *Sci Rep*. 2020;10(1):20090.
20. Sievert LL. Subjective and objective measures of hot flashes. *Am J Hum Biol* [Internet]. 2013;25(5):573–80. Available from: <https://onlinelibrary.wiley.com/doi/abs/10.1002/ajhb.22415>
21. Internet access – households and individuals, Great Britain - Office for National Statistics [Internet]. [cited 2023 Nov 2]. Available from: <https://www.ons.gov.uk/peoplepopulationandcommunity/householdcharacteristics/homeinternetandsocialmediausage/bulletins/internetaccesshouseholdsandindividuals/2018#mobile-phones-or-smartphones-still-most-popular-devices-used-to-access-the-internet>

- 1  
2  
3  
4  
5  
6  
7  
8  
9  
10  
11  
12  
13  
14  
15  
16  
17  
18  
19  
20  
21  
22  
23  
24  
25  
26  
27  
28  
29  
30  
31  
32  
33  
34  
35  
36  
37  
38  
39  
40  
41  
42  
43  
44  
45  
46  
47  
48  
49  
50  
51  
52  
53  
54  
55  
56  
57  
58  
59  
60
22. Fathy Fathalla Zaied N, Hassan Shamekh Taman A, Hassan Mohamed Alam T, Zaki Hassan Roma N. Effect of paced breathing technique on hot flashes and quality of daily life activities among surgically menopausal women. *Egypt J Health Care* [Internet]. 2019 Dec 1 [cited 2023 Nov 2];10(4):693–706. Available from: [https://ejhc.journals.ekb.eg/article\\_266502.html](https://ejhc.journals.ekb.eg/article_266502.html)
23. Sung MK, Lee US, Ha NH, Koh E, Yang HJ. A potential association of meditation with menopausal symptoms and blood chemistry in healthy women. *Medicine (Baltimore)* [Internet]. 2020 Sep 4 [cited 2023 Nov 2];99(36):e22048. Available from: <https://www.ncbi.nlm.nih.gov/pmc/articles/PMC7478772/>

For peer review only

30  
29  
28  
27  
26  
25  
24  
23  
22  
21  
20  
19  
18  
17  
16  
15  
14  
13  
12  
11  
10  
9  
8  
7  
6  
5  
4  
3  
2  
1

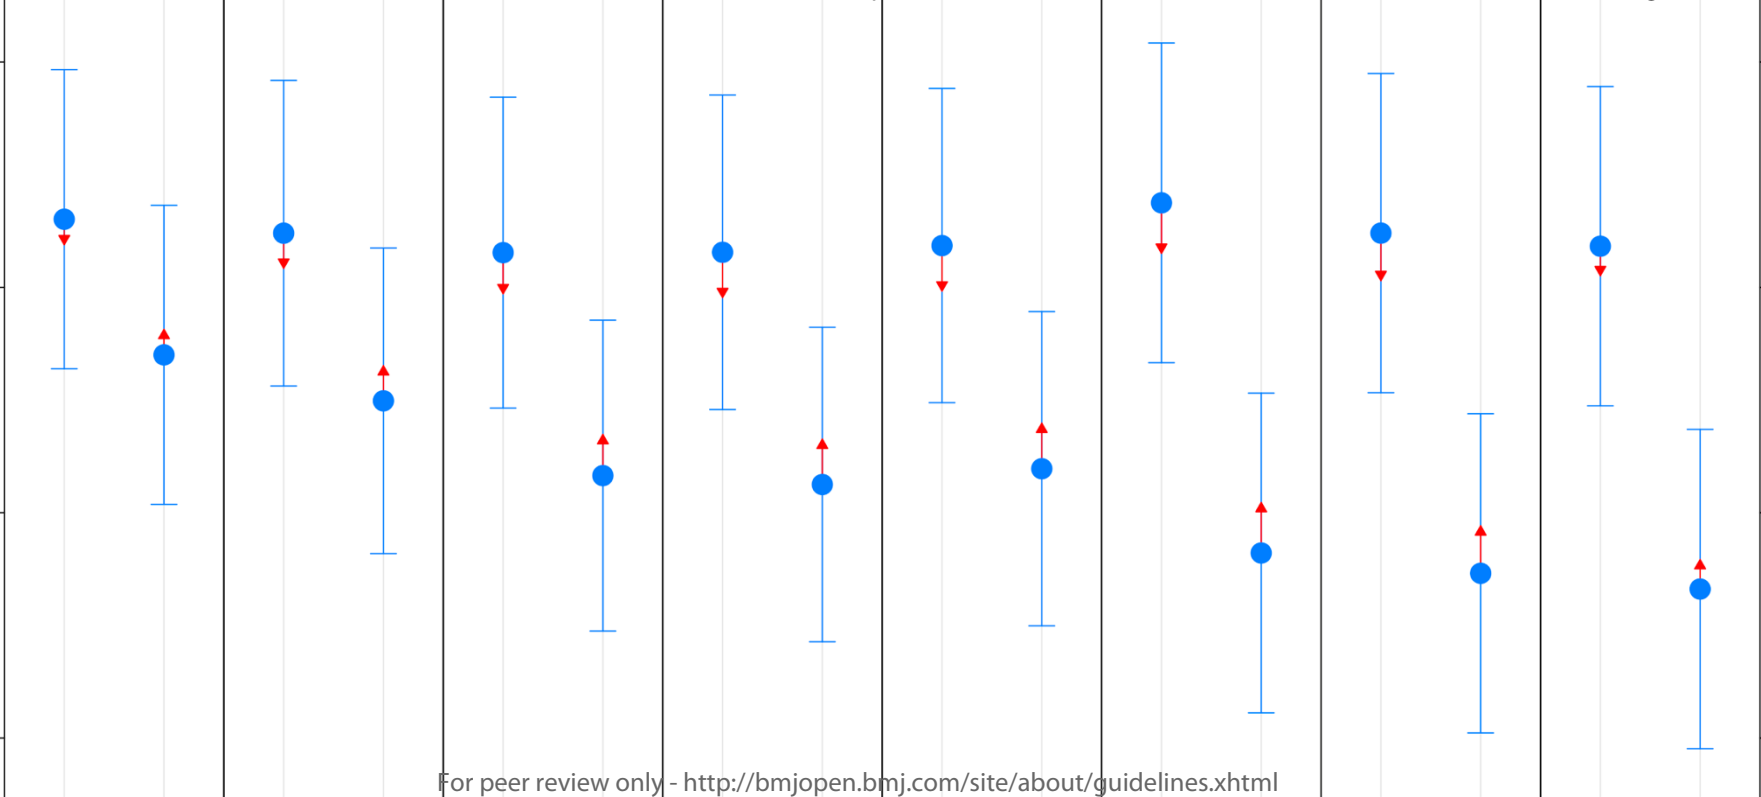

PrePost

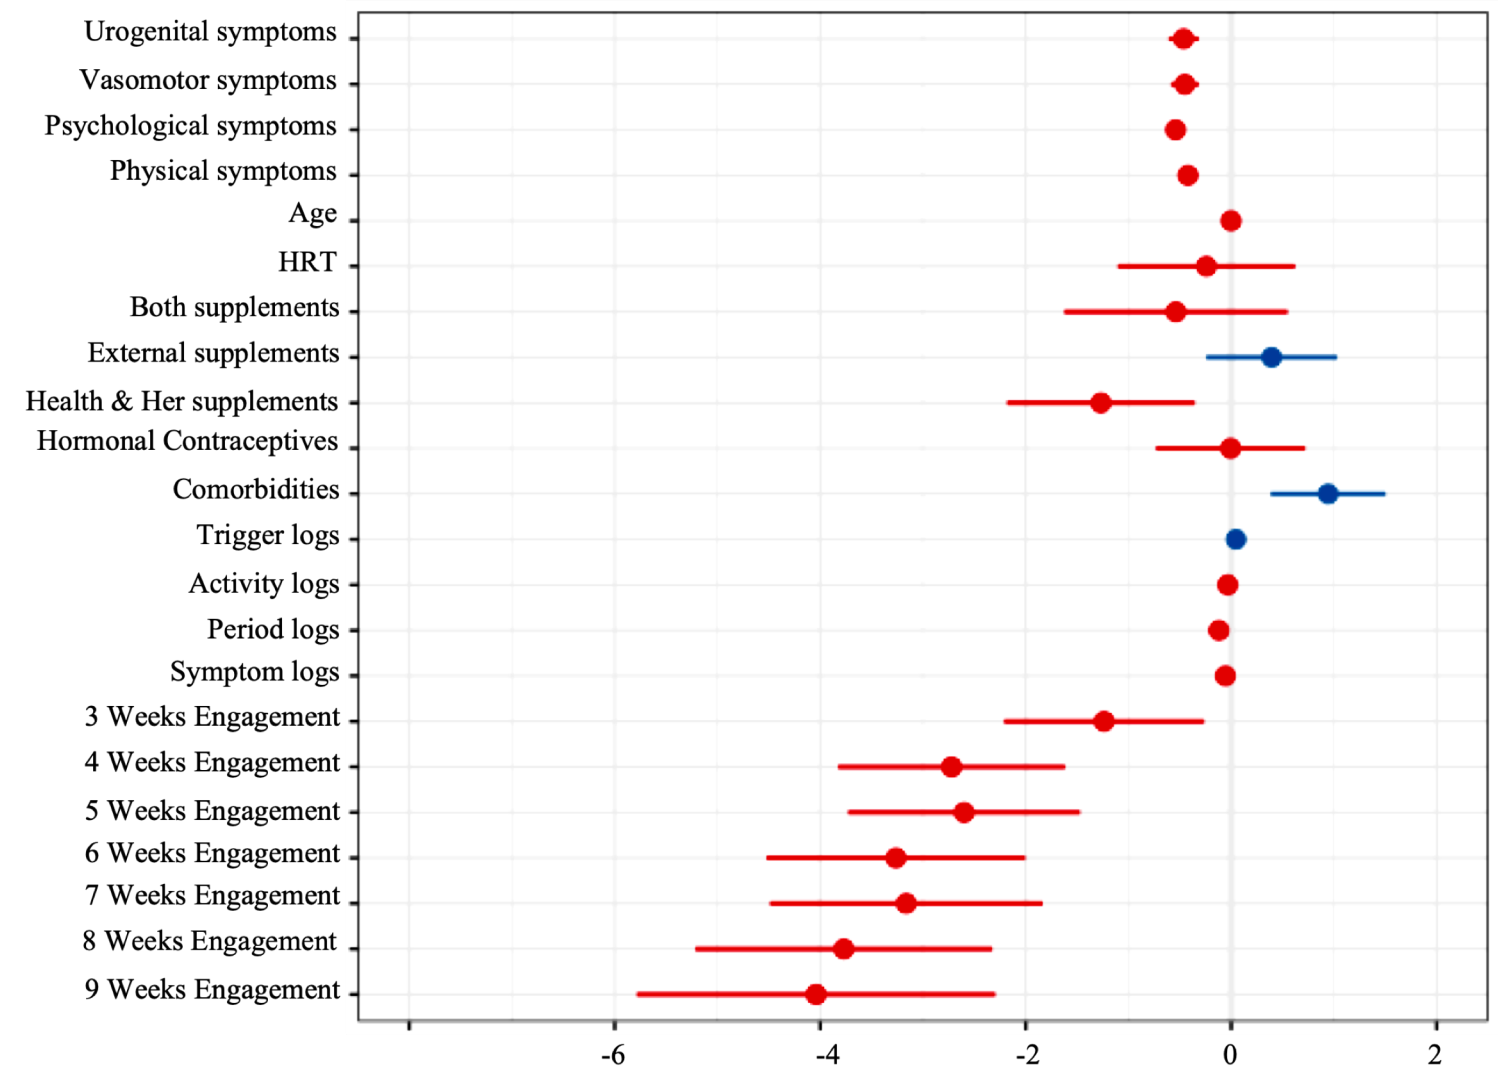

1  
2  
3  
4  
5  
6  
7  
8  
9  
10  
11  
12  
13  
14  
15  
16  
17  
18  
19  
20  
21  
22  
23  
24  
25  
26  
27  
28  
29  
30  
31  
32  
33  
34  
35  
36  
37  
38  
39  
40  
41

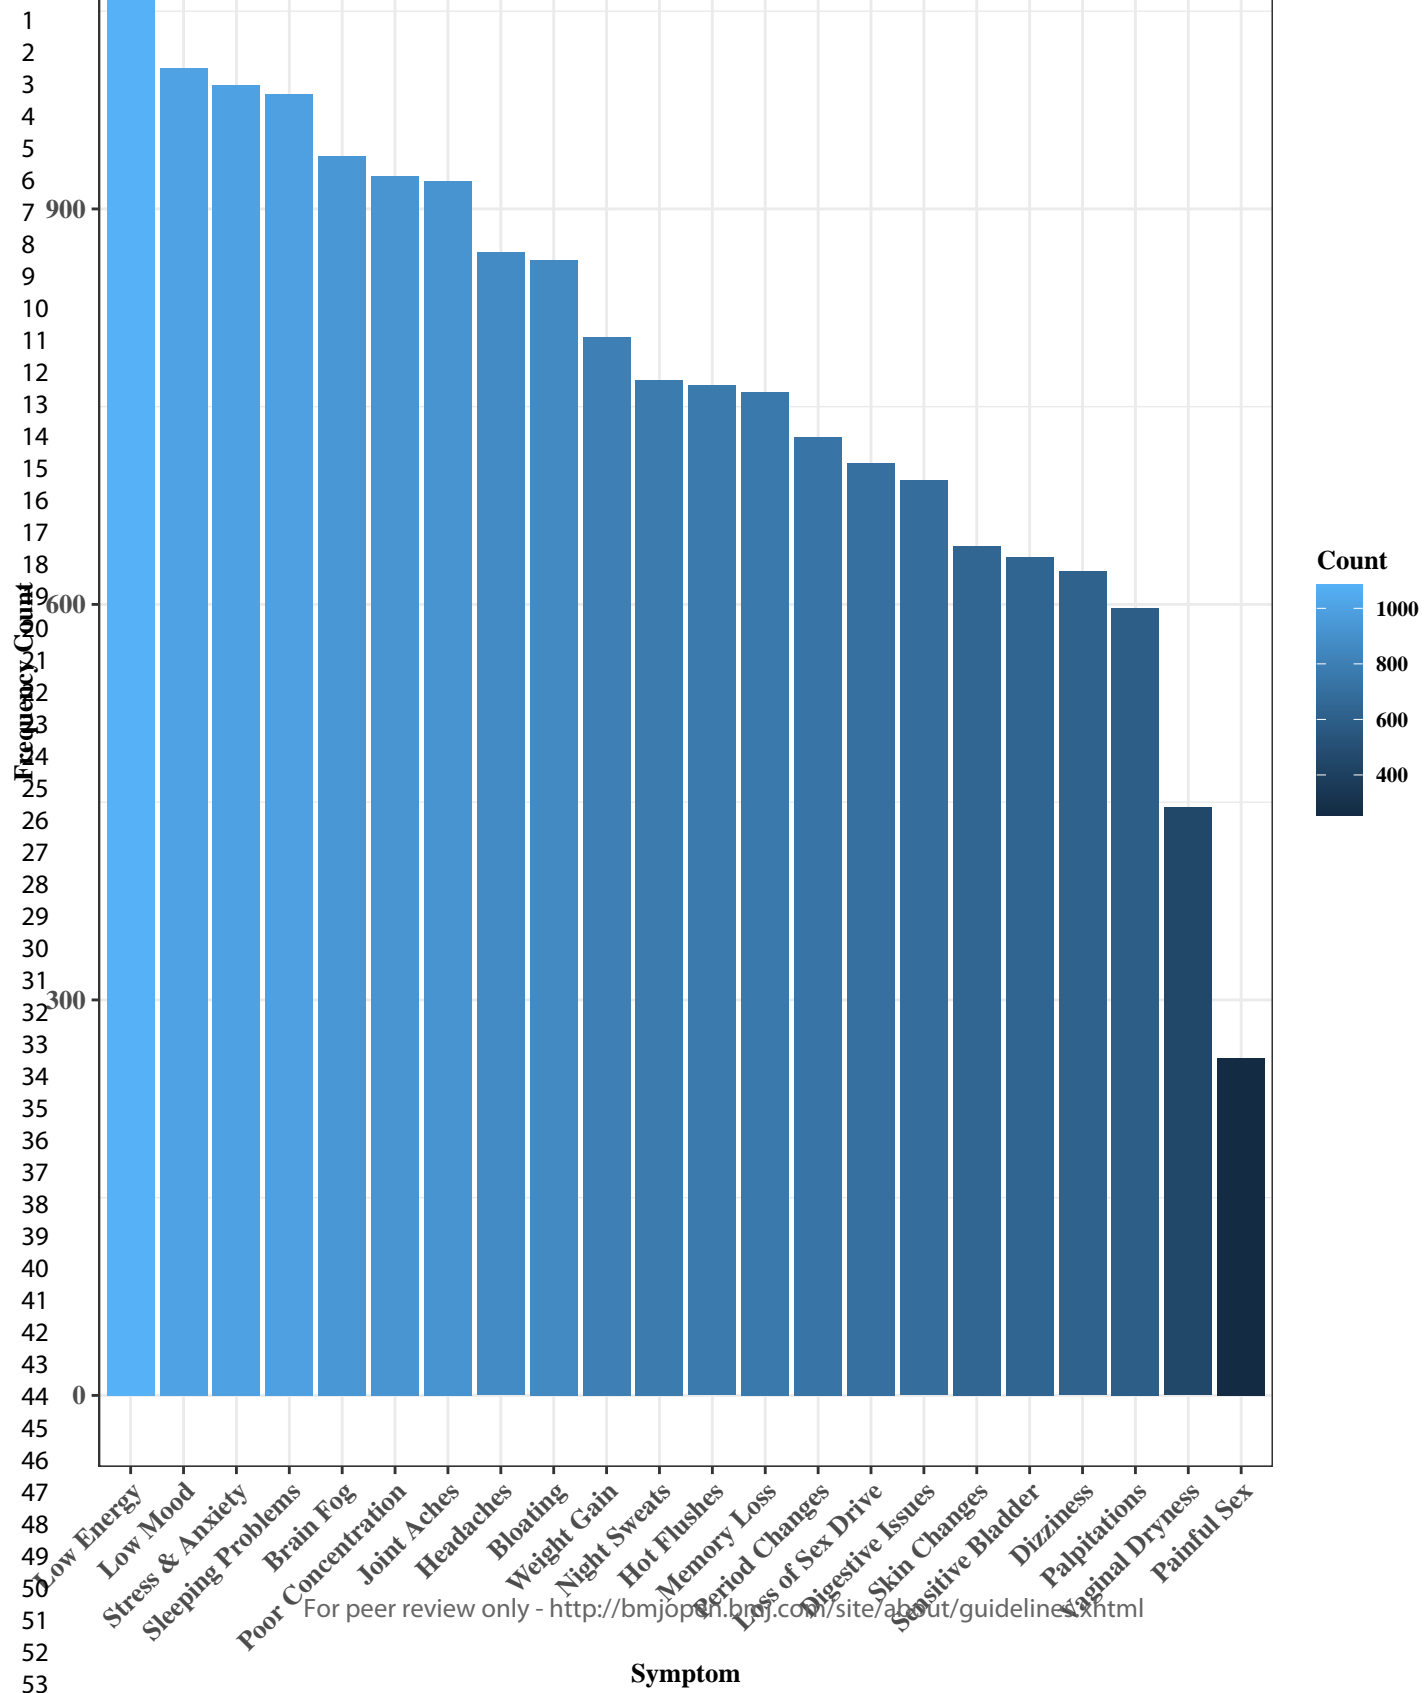

Table S1: Between Group Variances:

| Variable               | Total Weeks Engaged                |                            |                            |                            |                            |                            |                            |                            |                            | q-value <sup>2,3</sup> |
|------------------------|------------------------------------|----------------------------|----------------------------|----------------------------|----------------------------|----------------------------|----------------------------|----------------------------|----------------------------|------------------------|
|                        | Overall, N =<br>1,900 <sup>1</sup> | 2, N =<br>495 <sup>1</sup> | 3, N =<br>253 <sup>1</sup> | 4, N =<br>171 <sup>1</sup> | 5, N =<br>170 <sup>1</sup> | 6, N =<br>137 <sup>1</sup> | 7, N =<br>132 <sup>1</sup> | 8, N =<br>129 <sup>1</sup> | 9, N =<br>413 <sup>1</sup> |                        |
| Age                    | 48.1 (4.7)                         | 48.9 (4.8)                 | 48.7 (4.8)                 | 47.6 (4.5)                 | 47.0 (4.9)                 | 47.6 (4.0)                 | 46.5 (5.0)                 | 47.6 (4.7)                 | 48.2 (4.5)                 | <0.001                 |
| Using HRT              | 227 (12%)                          | 72 (15%)                   | 28 (11%)                   | 20 (12%)                   | 18 (11%)                   | 11 (8.0%)                  | 17 (13%)                   | 15 (12%)                   | 46 (11%)                   | 0.5                    |
| Using Contraceptives   | 343 (18%)                          | 102 (21%)                  | 50 (20%)                   | 22 (13%)                   | 27 (16%)                   | 18 (13%)                   | 27 (20%)                   | 19 (15%)                   | 78 (19%)                   | 0.2                    |
| Not using Supplements  | 1,003 (53%)                        | 268 (54%)                  | 142 (56%)                  | 96 (56%)                   | 89 (52%)                   | 73 (53%)                   | 63 (48%)                   | 71 (55%)                   | 201 (49%)                  | 0.3                    |
| Reported Comorbidities | 1,010 (53%)                        | 267 (54%)                  | 143 (57%)                  | 84 (49%)                   | 98 (58%)                   | 73 (53%)                   | 73 (55%)                   | 50 (39%)                   | 222 (54%)                  | 0.061                  |
| Symptom Logs           | 16 (17)                            | 2 (1)                      | 5 (2)                      | 7 (3)                      | 10 (4)                     | 15 (6)                     | 18 (6)                     | 25 (9)                     | 44 (13)                    | <0.001                 |
| Trigger Logs           | 10 (13)                            | 2 (1)                      | 3 (2)                      | 4 (3)                      | 6 (4)                      | 8 (7)                      | 11 (6)                     | 14 (12)                    | 27 (18)                    | <0.001                 |
| Activity Logs          | 4 (10)                             | 1 (1)                      | 2 (3)                      | 2 (6)                      | 2 (5)                      | 4 (9)                      | 5 (11)                     | 5 (10)                     | 10 (17)                    | <0.001                 |
| Period Logs            | 3 (3)                              | 1 (1)                      | 2 (2)                      | 2 (2)                      | 3 (3)                      | 3 (3)                      | 4 (3)                      | 3 (3)                      | 4 (5)                      | <0.001                 |
| Baseline Symptom Score | 17 (13)                            | 18 (14)                    | 17 (14)                    | 16 (14)                    | 15 (13)                    | 16 (13)                    | 18 (13)                    | 15 (12)                    | 16 (12)                    | 0.2                    |
| Final Symptom Score    | 12 (12)                            | 15 (14)                    | 13 (12)                    | 12 (12)                    | 12 (12)                    | 11 (11)                    | 11 (10)                    | 10 (10)                    | 9 (8)                      | <0.001                 |

<sup>1</sup> Mean (SD) or Frequency (%)

<sup>2</sup> Kruskal-Wallis rank sum test; Pearson's Chi-squared test

<sup>3</sup> Benjamini & Hochberg correction for multiple testing

# Reporting checklist for cohort study.

Based on the STROBE cohort guidelines.

## Instructions to authors

Complete this checklist by entering the page numbers from your manuscript where readers will find each of the items listed below.

Your article may not currently address all the items on the checklist. Please modify your text to include the missing information. If you are certain that an item does not apply, please write "n/a" and provide a short explanation.

Upload your completed checklist as an extra file when you submit to a journal.

In your methods section, say that you used the STROBE cohort reporting guidelines, and cite them as:

von Elm E, Altman DG, Egger M, Pocock SJ, Gøtzsche PC, Vandenbroucke JP. The Strengthening of Reporting of Observational Studies in Epidemiology (STROBE) Statement: guidelines for reporting observational studies.

|                           |                     | Reporting Item                                                                                  | Page Number |
|---------------------------|---------------------|-------------------------------------------------------------------------------------------------|-------------|
| <b>Title and abstract</b> |                     |                                                                                                 |             |
| Title                     | <a href="#">#1a</a> | Indicate the study's design with a commonly used term in the title or the abstract              | 1           |
| Abstract                  | <a href="#">#1b</a> | Provide in the abstract an informative and balanced summary of what was done and what was found | 2           |
| <b>Introduction</b>       |                     |                                                                                                 |             |
| Background / rationale    | <a href="#">#2</a>  | Explain the scientific background and rationale for the investigation being reported            | 3           |
| Objectives                | <a href="#">#3</a>  | State specific objectives, including any prespecified hypotheses                                | 3           |
| <b>Methods</b>            |                     |                                                                                                 |             |
| Study design              | <a href="#">#4</a>  | Present key elements of study design early in the paper                                         | 4           |
| Setting                   | <a href="#">#5</a>  | Describe the setting, locations, and relevant dates, including periods                          | 4           |



|    |                      |                      |                                                                                                                                                                                                                                                                      |    |
|----|----------------------|----------------------|----------------------------------------------------------------------------------------------------------------------------------------------------------------------------------------------------------------------------------------------------------------------|----|
| 1  |                      |                      | of recruitment, exposure, follow-up, and data collection                                                                                                                                                                                                             |    |
| 2  |                      |                      |                                                                                                                                                                                                                                                                      |    |
| 3  | Eligibility criteria | <a href="#">#6a</a>  | Give the eligibility criteria, and the sources and methods of selection of participants. Describe methods of follow-up.                                                                                                                                              | 4  |
| 4  |                      |                      |                                                                                                                                                                                                                                                                      |    |
| 5  |                      |                      |                                                                                                                                                                                                                                                                      |    |
| 6  | Eligibility criteria | <a href="#">#6b</a>  | For matched studies, give matching criteria and number of exposed and unexposed                                                                                                                                                                                      | 4  |
| 7  |                      |                      |                                                                                                                                                                                                                                                                      |    |
| 8  |                      |                      |                                                                                                                                                                                                                                                                      |    |
| 9  |                      |                      |                                                                                                                                                                                                                                                                      |    |
| 10 | Variables            | <a href="#">#7</a>   | Clearly define all outcomes, exposures, predictors, potential confounders, and effect modifiers. Give diagnostic criteria, if applicable                                                                                                                             | 5  |
| 11 |                      |                      |                                                                                                                                                                                                                                                                      |    |
| 12 |                      |                      |                                                                                                                                                                                                                                                                      |    |
| 13 |                      |                      |                                                                                                                                                                                                                                                                      |    |
| 14 |                      |                      |                                                                                                                                                                                                                                                                      |    |
| 15 | Data sources /       | <a href="#">#8</a>   | For each variable of interest give sources of data and details of methods of assessment (measurement). Describe comparability of assessment methods if there is more than one group. Give information separately for for exposed and unexposed groups if applicable. | 5  |
| 16 | measurement          |                      |                                                                                                                                                                                                                                                                      |    |
| 17 |                      |                      |                                                                                                                                                                                                                                                                      |    |
| 18 |                      |                      |                                                                                                                                                                                                                                                                      |    |
| 19 |                      |                      |                                                                                                                                                                                                                                                                      |    |
| 20 |                      |                      |                                                                                                                                                                                                                                                                      |    |
| 21 |                      |                      |                                                                                                                                                                                                                                                                      |    |
| 22 | Bias                 | <a href="#">#9</a>   | Describe any efforts to address potential sources of bias                                                                                                                                                                                                            | 6  |
| 23 |                      |                      |                                                                                                                                                                                                                                                                      |    |
| 24 | Study size           | <a href="#">#10</a>  | Explain how the study size was arrived at                                                                                                                                                                                                                            | 6  |
| 25 |                      |                      |                                                                                                                                                                                                                                                                      |    |
| 26 |                      |                      |                                                                                                                                                                                                                                                                      |    |
| 27 | Quantitative         | <a href="#">#11</a>  | Explain how quantitative variables were handled in the analyses. If applicable, describe which groupings were chosen, and why                                                                                                                                        | 6  |
| 28 | variables            |                      |                                                                                                                                                                                                                                                                      |    |
| 29 |                      |                      |                                                                                                                                                                                                                                                                      |    |
| 30 |                      |                      |                                                                                                                                                                                                                                                                      |    |
| 31 | Statistical          | <a href="#">#12a</a> | Describe all statistical methods, including those used to control for confounding                                                                                                                                                                                    |    |
| 32 | methods              |                      |                                                                                                                                                                                                                                                                      |    |
| 33 |                      |                      |                                                                                                                                                                                                                                                                      |    |
| 34 |                      |                      |                                                                                                                                                                                                                                                                      |    |
| 35 | 6                    |                      |                                                                                                                                                                                                                                                                      |    |
| 36 |                      |                      |                                                                                                                                                                                                                                                                      |    |
| 37 | Statistical          | <a href="#">#12b</a> | Describe any methods used to examine subgroups and interactions                                                                                                                                                                                                      | 6  |
| 38 | methods              |                      |                                                                                                                                                                                                                                                                      |    |
| 39 |                      |                      |                                                                                                                                                                                                                                                                      |    |
| 40 |                      |                      |                                                                                                                                                                                                                                                                      |    |
| 41 | Statistical          | <a href="#">#12c</a> | Explain how missing data were addressed                                                                                                                                                                                                                              | 6  |
| 42 | methods              |                      |                                                                                                                                                                                                                                                                      |    |
| 43 |                      |                      |                                                                                                                                                                                                                                                                      |    |
| 44 | Statistical          | <a href="#">#12d</a> | If applicable, explain how loss to follow-up was addressed                                                                                                                                                                                                           | 6  |
| 45 | methods              |                      |                                                                                                                                                                                                                                                                      |    |
| 46 |                      |                      |                                                                                                                                                                                                                                                                      |    |
| 47 |                      |                      |                                                                                                                                                                                                                                                                      |    |
| 48 | Statistical          | <a href="#">#12e</a> | Describe any sensitivity analyses                                                                                                                                                                                                                                    |    |
| 49 | methods              |                      |                                                                                                                                                                                                                                                                      |    |
| 50 |                      |                      |                                                                                                                                                                                                                                                                      |    |
| 51 |                      |                      |                                                                                                                                                                                                                                                                      |    |
| 52 | 6                    |                      |                                                                                                                                                                                                                                                                      |    |
| 53 |                      |                      |                                                                                                                                                                                                                                                                      |    |
| 54 | <b>Results</b>       |                      |                                                                                                                                                                                                                                                                      |    |
| 55 |                      |                      |                                                                                                                                                                                                                                                                      |    |
| 56 |                      |                      |                                                                                                                                                                                                                                                                      |    |
| 57 | Participants         | <a href="#">#13a</a> | Report numbers of individuals at each stage of study—eg numbers potentially eligible, examined for eligibility, confirmed eligible,                                                                                                                                  | NA |
| 58 |                      |                      |                                                                                                                                                                                                                                                                      |    |
| 59 |                      |                      |                                                                                                                                                                                                                                                                      |    |
| 60 |                      |                      |                                                                                                                                                                                                                                                                      |    |

included in the study, completing follow-up, and analysed. Give information separately for for exposed and unexposed groups if applicable.

|    |                  |                      |                                                                                                                                                                                                                   |
|----|------------------|----------------------|-------------------------------------------------------------------------------------------------------------------------------------------------------------------------------------------------------------------|
| 1  |                  |                      |                                                                                                                                                                                                                   |
| 2  |                  |                      |                                                                                                                                                                                                                   |
| 3  |                  |                      |                                                                                                                                                                                                                   |
| 4  |                  |                      |                                                                                                                                                                                                                   |
| 5  | Participants     | <a href="#">#13b</a> | Give reasons for non-participation at each stage                                                                                                                                                                  |
| 6  |                  |                      | NA                                                                                                                                                                                                                |
| 7  | Participants     | <a href="#">#13c</a> | Consider use of a flow diagram                                                                                                                                                                                    |
| 8  |                  |                      |                                                                                                                                                                                                                   |
| 9  |                  |                      |                                                                                                                                                                                                                   |
| 10 | NA               |                      |                                                                                                                                                                                                                   |
| 11 |                  |                      |                                                                                                                                                                                                                   |
| 12 | Descriptive data | <a href="#">#14a</a> | Give characteristics of study participants (eg demographic, clinical, social) and information on exposures and potential confounders. Give information separately for exposed and unexposed groups if applicable. |
| 13 |                  |                      | 8                                                                                                                                                                                                                 |
| 14 |                  |                      |                                                                                                                                                                                                                   |
| 15 |                  |                      |                                                                                                                                                                                                                   |
| 16 |                  |                      |                                                                                                                                                                                                                   |
| 17 |                  |                      |                                                                                                                                                                                                                   |
| 18 |                  |                      |                                                                                                                                                                                                                   |
| 19 | Descriptive data | <a href="#">#14b</a> | Indicate number of participants with missing data for each variable of interest                                                                                                                                   |
| 20 |                  |                      |                                                                                                                                                                                                                   |
| 21 |                  |                      |                                                                                                                                                                                                                   |
| 22 |                  |                      |                                                                                                                                                                                                                   |
| 23 | NA               |                      |                                                                                                                                                                                                                   |
| 24 |                  |                      |                                                                                                                                                                                                                   |
| 25 | Descriptive data | <a href="#">#14c</a> | Summarise follow-up time (eg, average and total amount)                                                                                                                                                           |
| 26 |                  |                      |                                                                                                                                                                                                                   |
| 27 |                  |                      |                                                                                                                                                                                                                   |
| 28 | 7                |                      |                                                                                                                                                                                                                   |
| 29 |                  |                      |                                                                                                                                                                                                                   |
| 30 | Outcome data     | <a href="#">#15</a>  | Report numbers of outcome events or summary measures over time. Give information separately for exposed and unexposed groups if applicable.                                                                       |
| 31 |                  |                      |                                                                                                                                                                                                                   |
| 32 |                  |                      |                                                                                                                                                                                                                   |
| 33 |                  |                      |                                                                                                                                                                                                                   |
| 34 |                  |                      |                                                                                                                                                                                                                   |
| 35 | 8                |                      |                                                                                                                                                                                                                   |
| 36 |                  |                      |                                                                                                                                                                                                                   |
| 37 |                  |                      |                                                                                                                                                                                                                   |
| 38 | Main results     | <a href="#">#16a</a> | Give unadjusted estimates and, if applicable, confounder-adjusted estimates and their precision (eg, 95% confidence interval). Make clear which confounders were adjusted for and why they were included          |
| 39 |                  |                      | 9                                                                                                                                                                                                                 |
| 40 |                  |                      |                                                                                                                                                                                                                   |
| 41 |                  |                      |                                                                                                                                                                                                                   |
| 42 |                  |                      |                                                                                                                                                                                                                   |
| 43 |                  |                      |                                                                                                                                                                                                                   |
| 44 | Main results     | <a href="#">#16b</a> | Report category boundaries when continuous variables were categorized                                                                                                                                             |
| 45 |                  |                      | 9                                                                                                                                                                                                                 |
| 46 |                  |                      |                                                                                                                                                                                                                   |
| 47 |                  |                      |                                                                                                                                                                                                                   |
| 48 | Main results     | <a href="#">#16c</a> | If relevant, consider translating estimates of relative risk into absolute risk for a meaningful time period                                                                                                      |
| 49 |                  |                      |                                                                                                                                                                                                                   |
| 50 |                  |                      |                                                                                                                                                                                                                   |
| 51 |                  |                      |                                                                                                                                                                                                                   |
| 52 | 9                |                      |                                                                                                                                                                                                                   |
| 53 |                  |                      |                                                                                                                                                                                                                   |
| 54 |                  |                      |                                                                                                                                                                                                                   |
| 55 | Other analyses   | <a href="#">#17</a>  | Report other analyses done—eg analyses of subgroups and interactions, and sensitivity analyses                                                                                                                    |
| 56 |                  |                      | 11                                                                                                                                                                                                                |
| 57 |                  |                      |                                                                                                                                                                                                                   |

## Discussion

|    |                    |                     |                                                                          |    |
|----|--------------------|---------------------|--------------------------------------------------------------------------|----|
| 1  | Key results        | <a href="#">#18</a> | Summarise key results with reference to study objectives                 | 12 |
| 2  |                    |                     |                                                                          |    |
| 3  | Limitations        | <a href="#">#19</a> | Discuss limitations of the study, taking into account sources of         | 13 |
| 4  |                    |                     | potential bias or imprecision. Discuss both direction and magnitude of   |    |
| 5  |                    |                     | any potential bias.                                                      |    |
| 6  |                    |                     |                                                                          |    |
| 7  |                    |                     |                                                                          |    |
| 8  | Interpretation     | <a href="#">#20</a> | Give a cautious overall interpretation considering objectives,           | 14 |
| 9  |                    |                     | limitations, multiplicity of analyses, results from similar studies, and |    |
| 10 |                    |                     | other relevant evidence.                                                 |    |
| 11 |                    |                     |                                                                          |    |
| 12 |                    |                     |                                                                          |    |
| 13 |                    |                     |                                                                          |    |
| 14 | Generalisability   | <a href="#">#21</a> | Discuss the generalisability (external validity) of the study results    | 14 |
| 15 |                    |                     |                                                                          |    |
| 16 | <b>Other</b>       |                     |                                                                          |    |
| 17 | <b>Information</b> |                     |                                                                          |    |
| 18 |                    |                     |                                                                          |    |
| 19 |                    |                     |                                                                          |    |
| 20 | Funding            | <a href="#">#22</a> | Give the source of funding and the role of the funders for the present   | 14 |
| 21 |                    |                     | study and, if applicable, for the original study on which the present    |    |
| 22 |                    |                     | article is based                                                         |    |
| 23 |                    |                     |                                                                          |    |
| 24 |                    |                     |                                                                          |    |

The STROBE checklist is distributed under the terms of the Creative Commons Attribution License CC-BY. This checklist was completed on 27. June 2023 using <https://www.goodreports.org/>, a tool made by the [EQUATOR Network](#) in collaboration with [Penelope.ai](#)
