# Supplementary material for: Does Health & Her app use improve menopausal symptoms? A longitudinal cohort study
Source: PubMed Central journal article supplement — BMJ Open. 2023 Dec 30;13(12):e077185. doi: 10.1136/bmjopen-2023-077185 (PMC10759107; doi:10.1136/bmjopen-2023-077185), 2023-12-30
Supplement: bmjopen-2023-077185supp001.pdf [file bmjopen-2023-077185supp001.pdf]

Table S1: Between Group Variances:

| Variable                                                              | Total Weeks Engaged             |                         |                         |                         |                         |                         |                         |                         |                         | q-value <sup>2,3</sup> |
|-----------------------------------------------------------------------|---------------------------------|-------------------------|-------------------------|-------------------------|-------------------------|-------------------------|-------------------------|-------------------------|-------------------------|------------------------|
|                                                                       | Overall, N = 1,900 <sup>1</sup> | 2, N = 495 <sup>1</sup> | 3, N = 253 <sup>1</sup> | 4, N = 171 <sup>1</sup> | 5, N = 170 <sup>1</sup> | 6, N = 137 <sup>1</sup> | 7, N = 132 <sup>1</sup> | 8, N = 129 <sup>1</sup> | 9, N = 413 <sup>1</sup> |                        |
| Age                                                                   | 48.1 (4.7)                      | 48.9 (4.8)              | 48.7 (4.8)              | 47.6 (4.5)              | 47.0 (4.9)              | 47.6 (4.0)              | 46.5 (5.0)              | 47.6 (4.7)              | 48.2 (4.5)              | <0.001                 |
| Using HRT                                                             | 227 (12%)                       | 72 (15%)                | 28 (11%)                | 20 (12%)                | 18 (11%)                | 11 (8.0%)               | 17 (13%)                | 15 (12%)                | 46 (11%)                | 0.5                    |
| Using Contraceptives                                                  | 343 (18%)                       | 102 (21%)               | 50 (20%)                | 22 (13%)                | 27 (16%)                | 18 (13%)                | 27 (20%)                | 19 (15%)                | 78 (19%)                | 0.2                    |
| Not using Supplements                                                 | 1,003 (53%)                     | 268 (54%)               | 142 (56%)               | 96 (56%)                | 89 (52%)                | 73 (53%)                | 63 (48%)                | 71 (55%)                | 201 (49%)               | 0.3                    |
| Reported Comorbidities                                                | 1,010 (53%)                     | 267 (54%)               | 143 (57%)               | 84 (49%)                | 98 (58%)                | 73 (53%)                | 73 (55%)                | 50 (39%)                | 222 (54%)               | 0.061                  |
| Symptom Logs                                                          | 16 (17)                         | 2 (1)                   | 5 (2)                   | 7 (3)                   | 10 (4)                  | 15 (6)                  | 18 (6)                  | 25 (9)                  | 44 (13)                 | <0.001                 |
| Trigger Logs                                                          | 10 (13)                         | 2 (1)                   | 3 (2)                   | 4 (3)                   | 6 (4)                   | 8 (7)                   | 11 (6)                  | 14 (12)                 | 27 (18)                 | <0.001                 |
| Activity Logs                                                         | 4 (10)                          | 1 (1)                   | 2 (3)                   | 2 (6)                   | 2 (5)                   | 4 (9)                   | 5 (11)                  | 5 (10)                  | 10 (17)                 | <0.001                 |
| Period Logs                                                           | 3 (3)                           | 1 (1)                   | 2 (2)                   | 2 (2)                   | 3 (3)                   | 3 (3)                   | 4 (3)                   | 3 (3)                   | 4 (5)                   | <0.001                 |
| Baseline Symptom Score                                                | 17 (13)                         | 18 (14)                 | 17 (14)                 | 16 (14)                 | 15 (13)                 | 16 (13)                 | 18 (13)                 | 15 (12)                 | 16 (12)                 | 0.2                    |
| Final Symptom Score                                                   | 12 (12)                         | 15 (14)                 | 13 (12)                 | 12 (12)                 | 12 (12)                 | 11 (11)                 | 11 (10)                 | 10 (10)                 | 9 (8)                   | <0.001                 |
| <sup>1</sup> Mean (SD) or Frequency (%)                               |                                 |                         |                         |                         |                         |                         |                         |                         |                         |                        |
| <sup>2</sup> Kruskal-Wallis rank sum test; Pearson's Chi-squared test |                                 |                         |                         |                         |                         |                         |                         |                         |                         |                        |
| <sup>3</sup> Benjamini & Hochberg correction for multiple testing     |                                 |                         |                         |                         |                         |                         |                         |                         |                         |                        |
